# Supplementary material for: Planar-chiral ferrocenylphosphine-borane complexes featuring agostic-type B–H⋯E (E = Hg, Sn) interactions
Source: Royal Society of Chemistry journal article supplement (doi:10.1039/c6dt04791b), 2017-01-01
Supplement: c6dt04791b1.pdf [file c6dt04791b1.pdf]

## Supporting Information

### Planar Chiral Ferrocenylphosphine-borane Complexes Featuring Agostic-type B–H···E (E = Hg, Sn) Interactions

Alain C. Tagne Kuate,<sup>a,b</sup> Roger A. Lalancette,<sup>a\*</sup> F. Jäkle<sup>a\*</sup>

<sup>a</sup>Department of Chemistry, Rutgers University-Newark, 73 Warren Street, Newark, NJ 07102,

USA

<sup>b</sup>Department of Chemistry, Faculty of Sciences, University of Dschang, P.O. Box 67, Dschang,

Cameroon

\* To whom correspondence should be addressed.

Email: [fjaekle@andromeda.rutgers.edu](mailto:fjaekle@andromeda.rutgers.edu) ; [rogerlal@andromeda.rutgers.edu](mailto:rogerlal@andromeda.rutgers.edu)

## Reaction of *rac*-5 with PhBCl<sub>2</sub>: Isolation of FcPPh<sub>2</sub>·BH<sub>3</sub>

During the course of our studies we also attempted the synthesis of boron-bridged diferrocenes. However, we could only isolate the parent species FcPPh<sub>2</sub>·BH<sub>3</sub>, presumably due to protonolysis. The lack of analytical data on FcPPh<sub>2</sub>·BH<sub>3</sub> in the literature encouraged us to perform a full characterization. The MALDI-TOF mass spectrum of FcPPh<sub>2</sub>·BH<sub>3</sub> showed a molecular ion peak at  $m/z = 767.5008$ , suggesting the presence of a dimer with loss of H<sub>2</sub>.

**Synthetic Procedure:** A solution of *rac*-5 (0.052 g, 0.084 mmol) in toluene (10 mL) was slowly added to a solution of PhBCl<sub>2</sub> (0.007 g, 0.042 mmol, 0.5 equiv) in toluene (2 mL) at -27 °C inside a glovebox. The mixture was stirred at room temperature for two days and heated at 90 °C overnight in a sealed flask. A grey solid was formed, which was removed by filtration and the solvent was evaporated in vacuum to leave a yellow-orange residue. The latter was taken in a minimum of THF and passed through a plug of Al<sub>2</sub>O<sub>3</sub> eluted with THF/hexane. The first band was concentrated, dissolved in CH<sub>2</sub>Cl<sub>2</sub>, layered with hexanes and stored at -25 °C. An orange solid crystallized that was identified to be ferrocenylphosphine-borane adduct FcPPh<sub>2</sub>·BH<sub>3</sub>. Yield: 0.023 g (69%). <sup>1</sup>H NMR (499.9 MHz, CDCl<sub>3</sub>, 25 °C): δ = 7.59 (m, 4H, Ph), 7.47 (m, 2H, Ph), 7.41 (m, 4H, Ph), 4.51 (nr, 2H, Cp), 4.42 (nr, 2H, Cp), 4.10 (s, 5H, free Cp), 1.25 (brm, 3H, BH<sub>3</sub>). <sup>13</sup>C{<sup>1</sup>H} NMR (125.7 MHz, CDCl<sub>3</sub>, 25 °C): δ = 133.0 (d, <sup>2</sup>J<sub>P,C</sub> = 9 Hz, *o*-Ph), 131.7 (d, <sup>1</sup>J<sub>P,C</sub> = 59 Hz, *i*-Ph), 131.2 (s, *p*-Ph), 128.8 (d, <sup>3</sup>J<sub>P,C</sub> = 10 Hz, *m*-Ph), 73.1 (d, J<sub>P,C</sub> = 10 Hz, Cp), 72.2 (d, <sup>1</sup>J<sub>P,C</sub> = 8 Hz, Cp), 70.1 (s, free Cp), 69.1 (d, <sup>1</sup>J<sub>P,C</sub> = 69 Hz, *i*-Cp-P). <sup>31</sup>P{<sup>1</sup>H} NMR (202.5 MHz, CDCl<sub>3</sub>, 25 °C): δ = 16.0 (nr). <sup>11</sup>B{<sup>1</sup>H} NMR (160.4 MHz, CDCl<sub>3</sub>, 25 °C): -38.4 (nr). High-resolution MALDI-TOF MS (positive mode, anthracene):  $m/z$  370.0545 [(FcPPh<sub>2</sub>)+H]<sup>+</sup>, 100%, calcd for <sup>12</sup>C<sub>22</sub><sup>1</sup>H<sub>19</sub><sup>11</sup>B<sup>56</sup>Fe<sup>31</sup>P 370.0568).

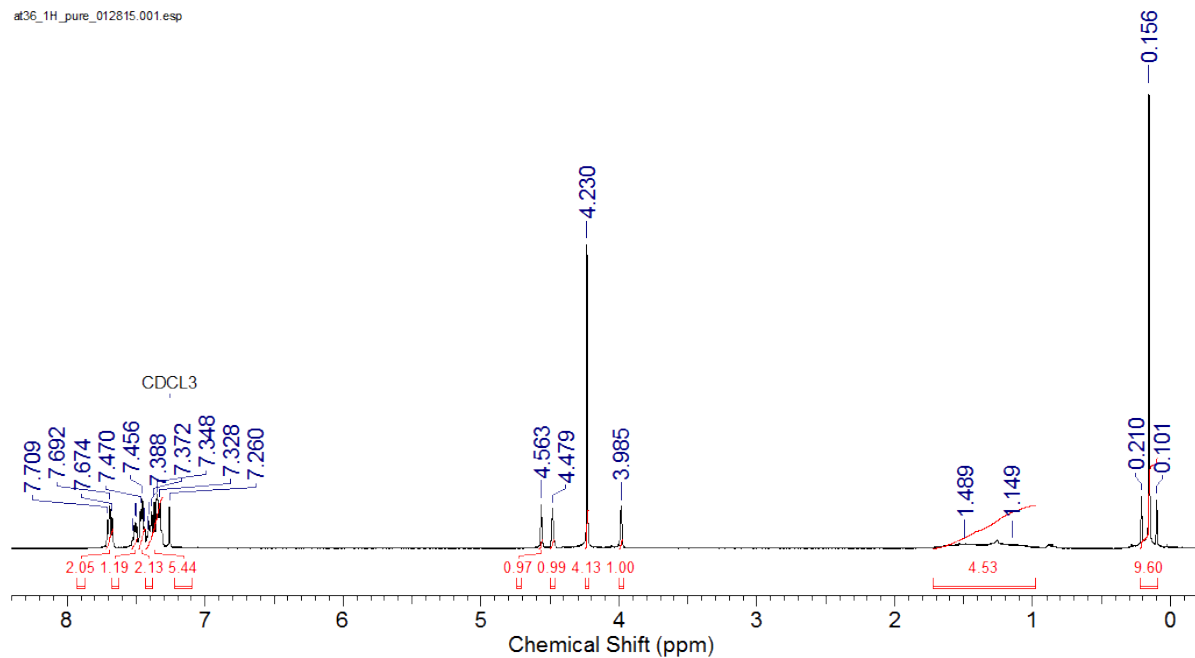

Figure S1.  $^1\text{H}$  NMR spectrum of (pS)-3.

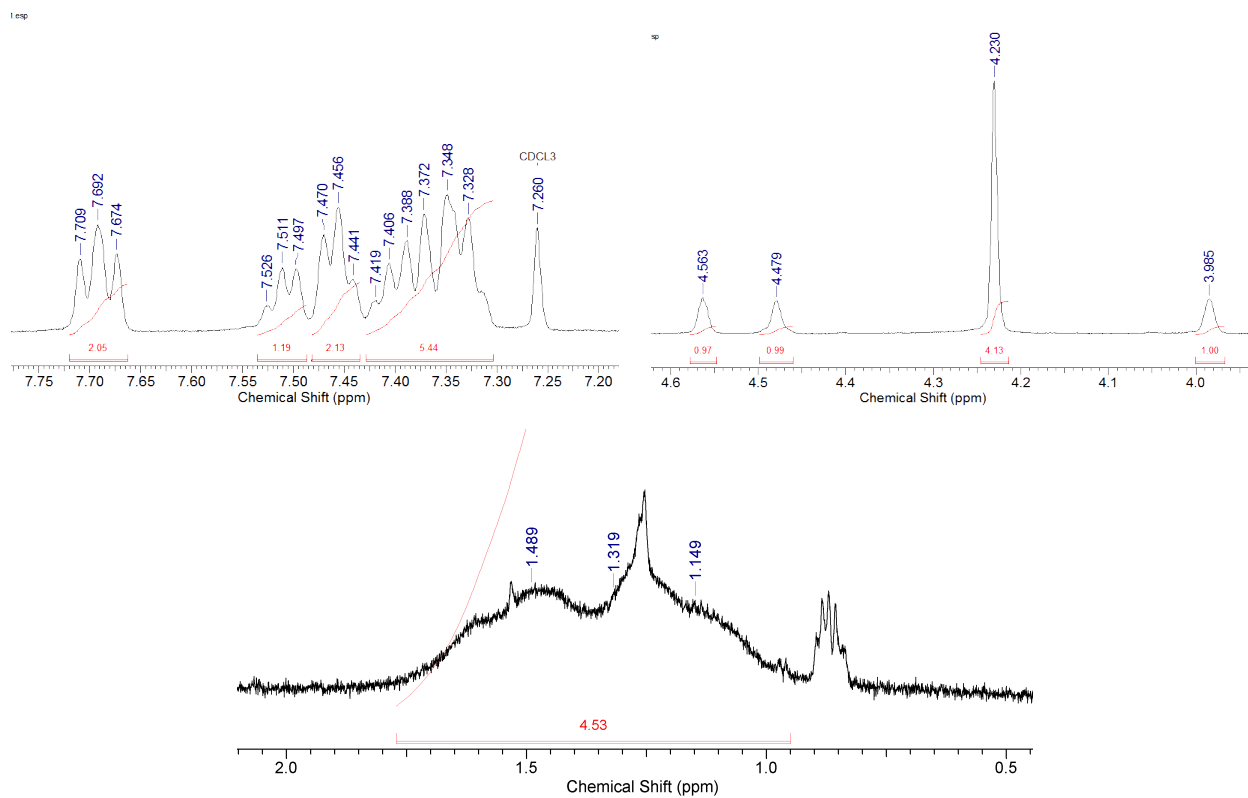

Figure S2. Expansions of the  $^1\text{H}$  NMR spectrum of (pS)-3.

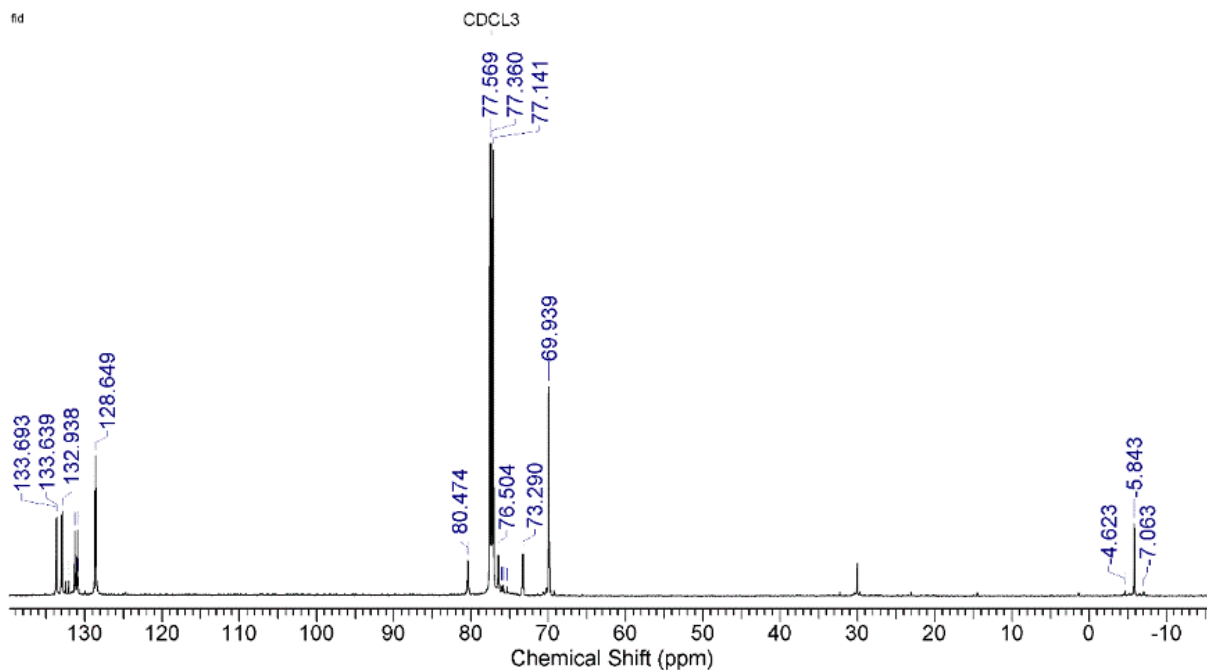

Figure S3a. <sup>13</sup>C NMR spectrum of (pS)-3.

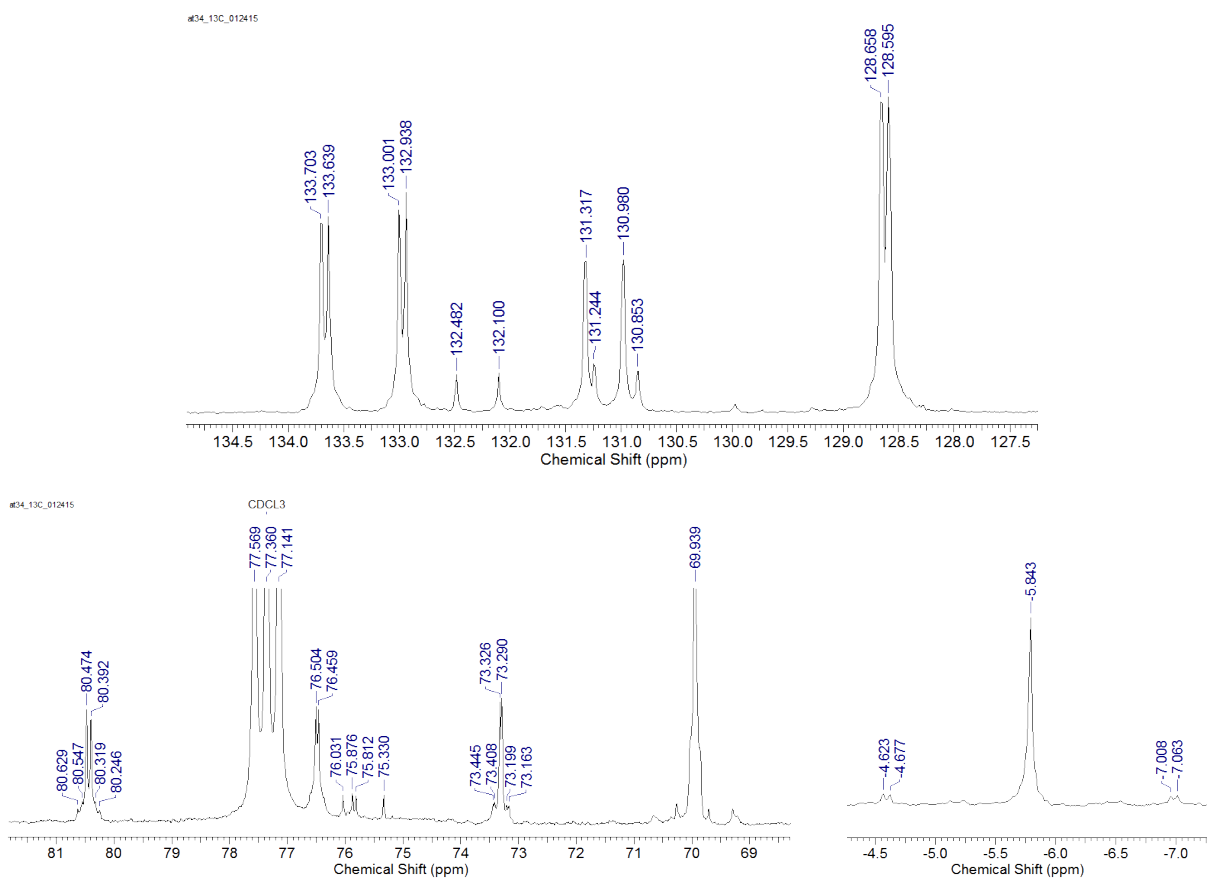

Figure S3b. Expansions of the <sup>13</sup>C NMR spectrum of (pS)-3.

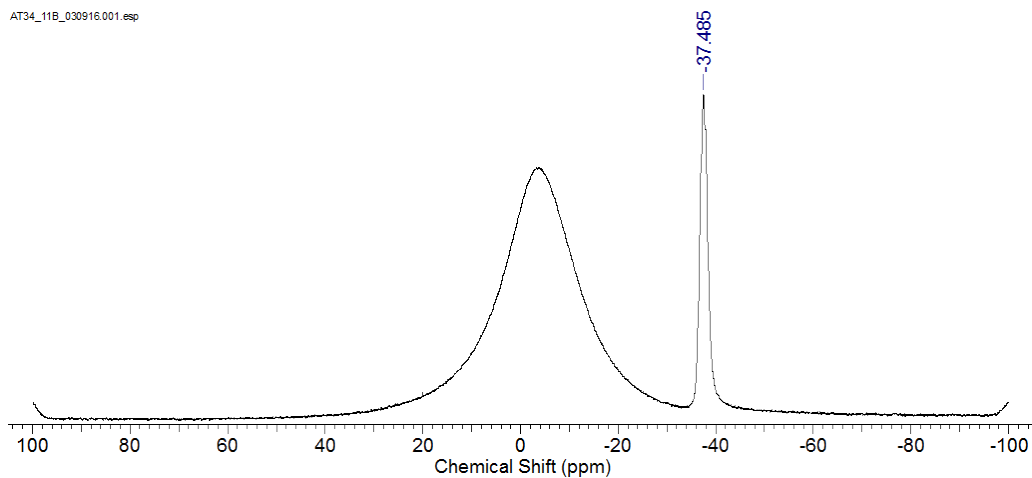

**Figure S4.**  $^{11}\text{B}$  NMR spectrum of (pS)-3.

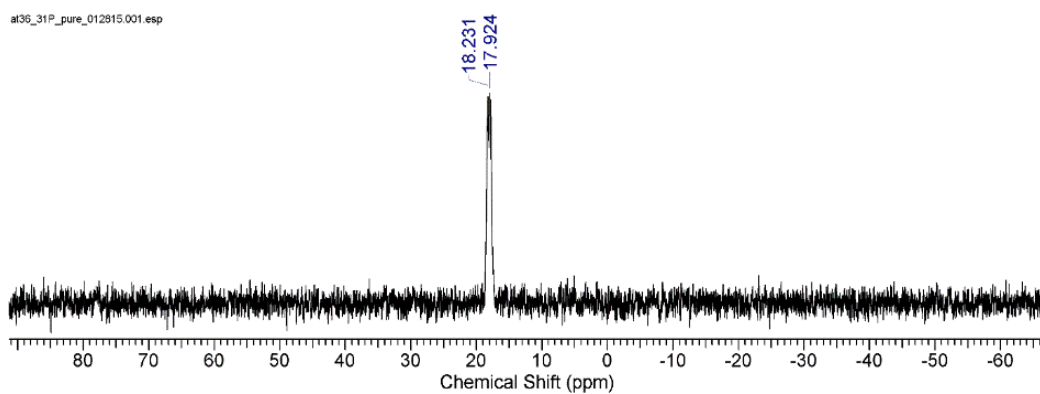

**Figure S5.**  $^{31}\text{P}$  NMR spectrum of (pS)-3.

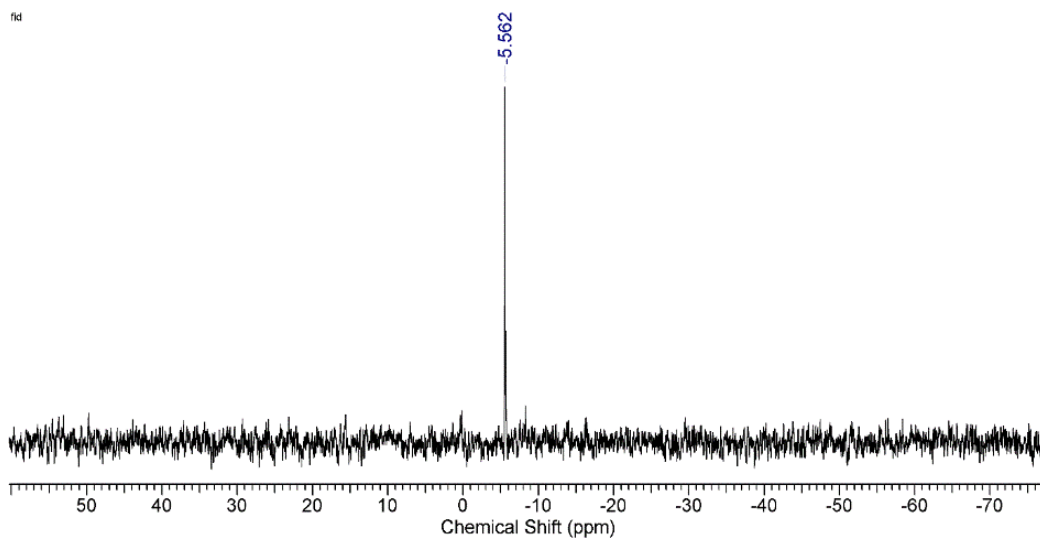

**Figure S6.**  $^{119}\text{Sn}$  NMR spectrum of (pS)-3.

#44\_1H\_pure\_040815

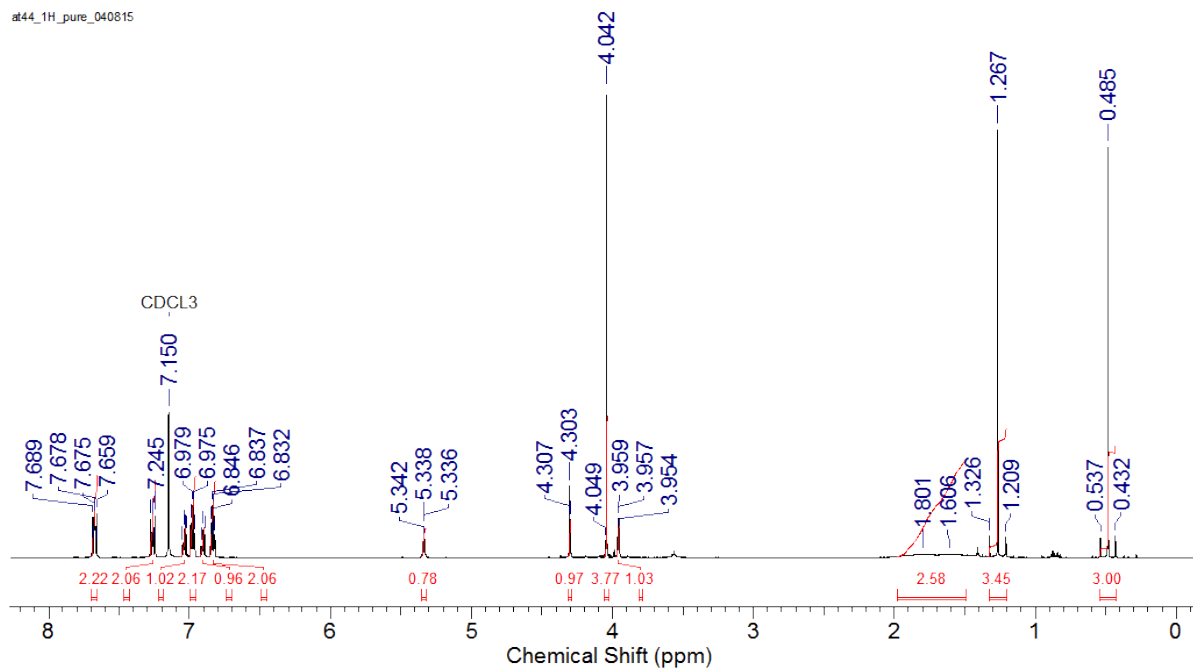

Figure S7a. <sup>1</sup>H NMR spectrum of (pS)-4.

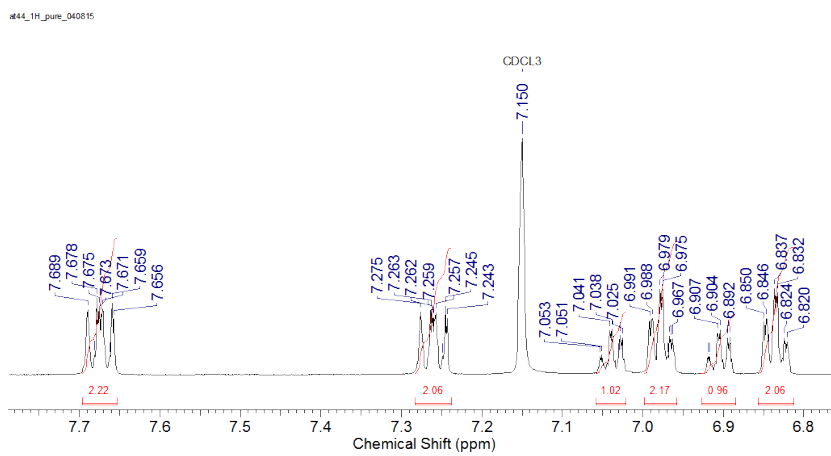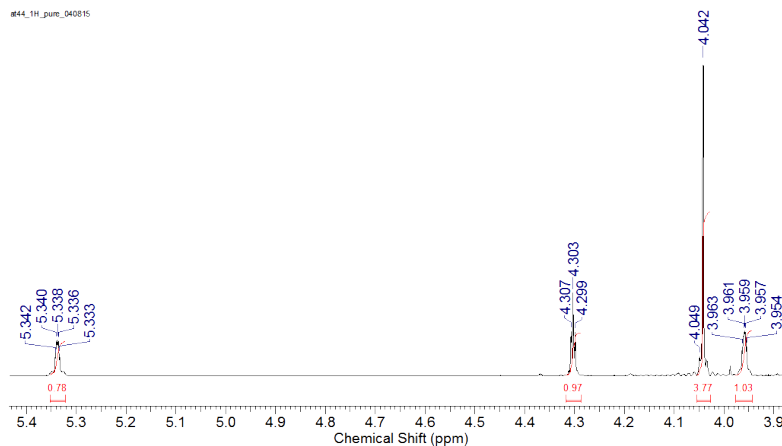

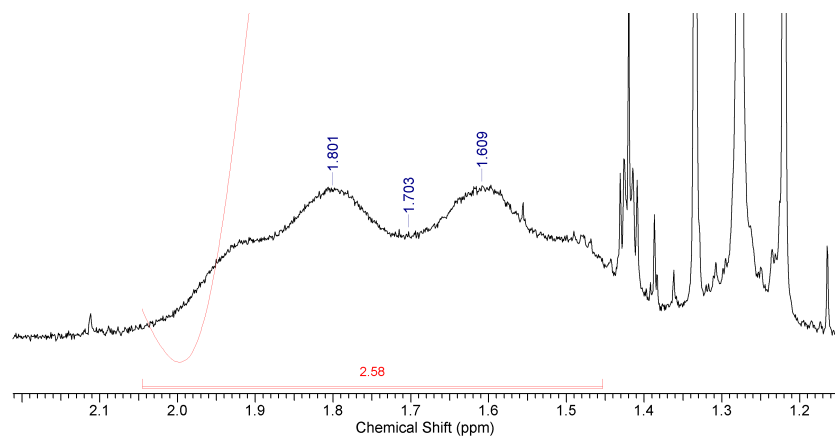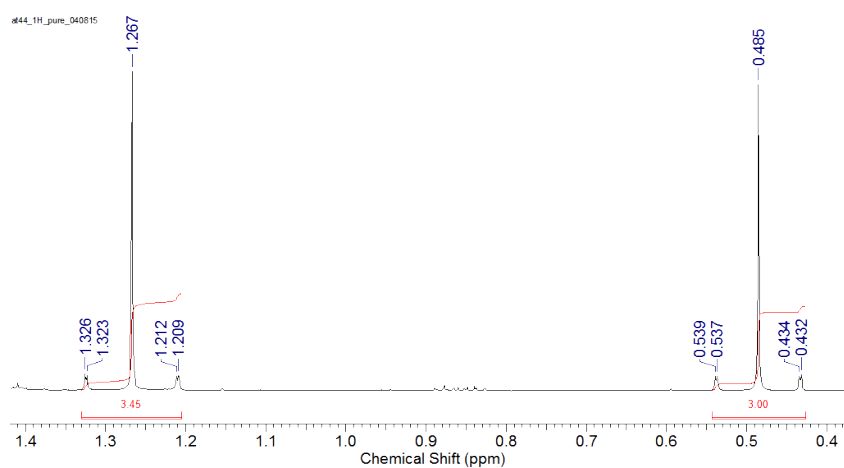

**Figure S7b.** Expansions of the  $^1\text{H}$  NMR spectrum of (pS)-4.

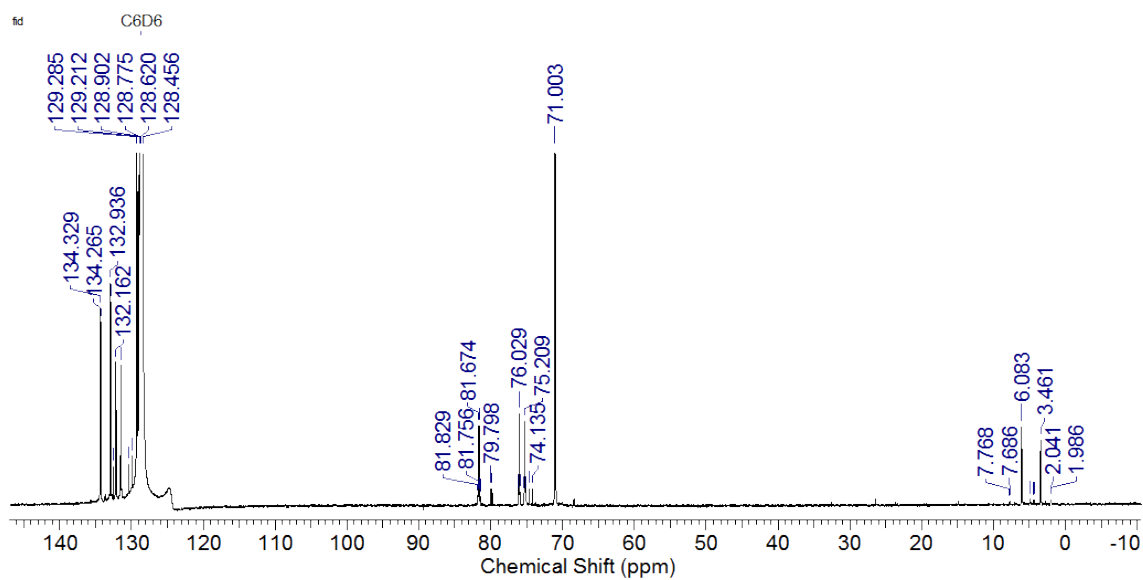

**Figure S8a.**  $^{13}\text{C}$  NMR spectrum of (pS)-4.

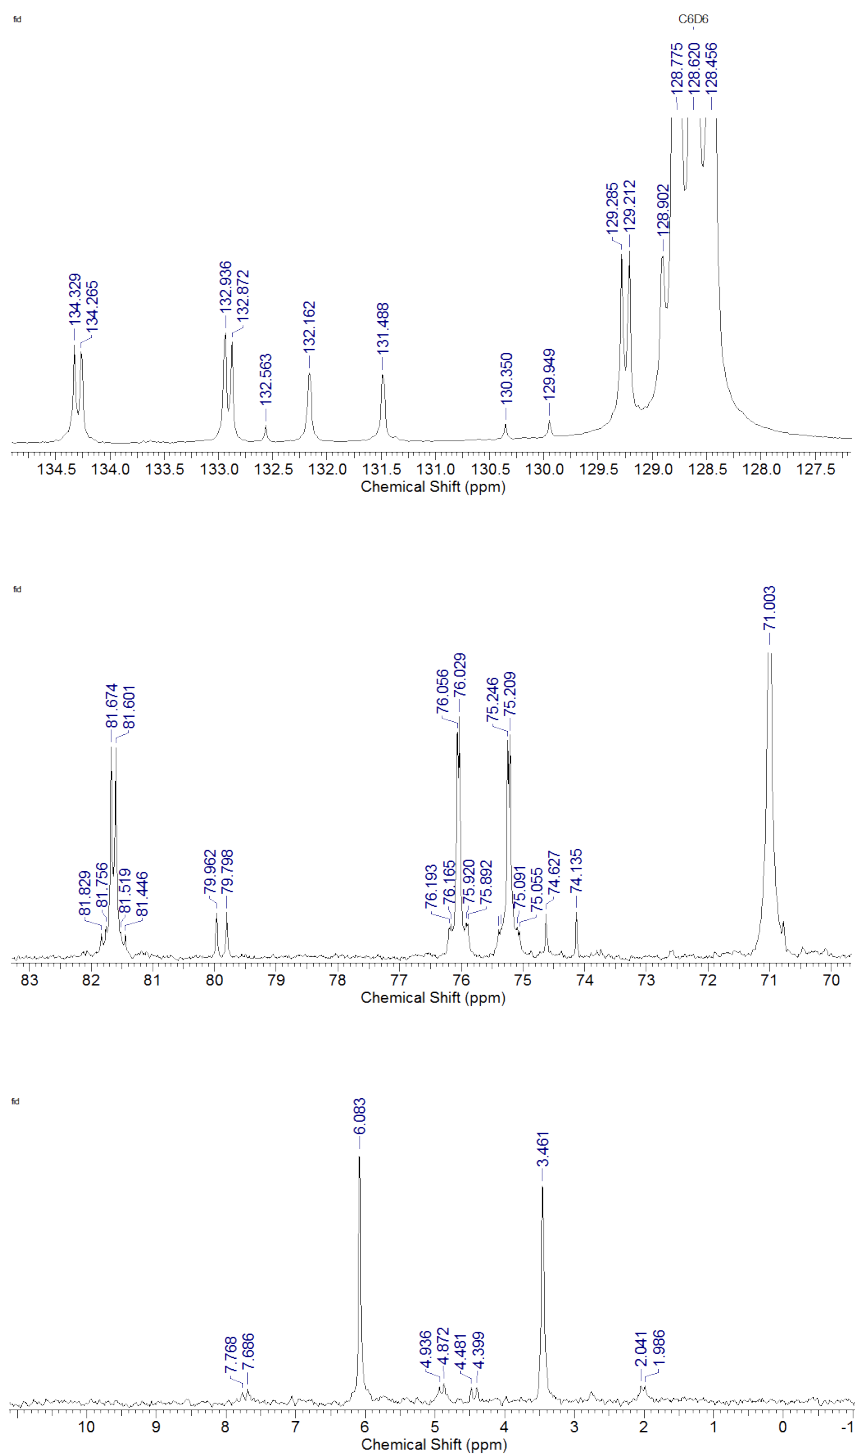

Figure S8b. Expansions of the  $^{13}\text{C}$  NMR spectrum of (pS)-4.



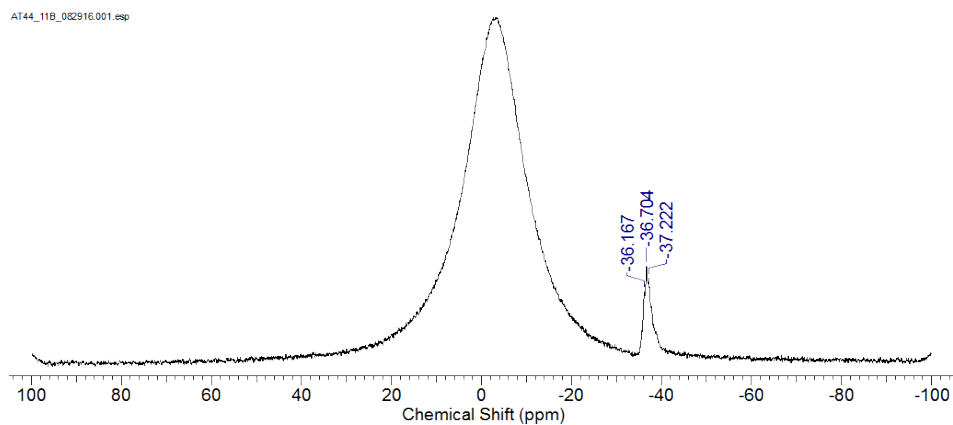

**Figure S9.**  $^{11}\text{B}$  NMR spectrum of (pS)-4.

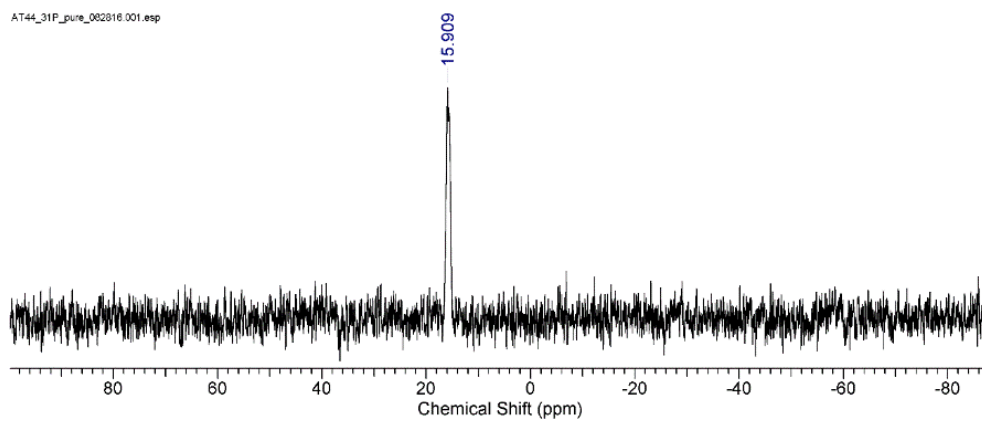

**Figure S10.**  $^{31}\text{P}$  NMR spectrum of (pS)-4.

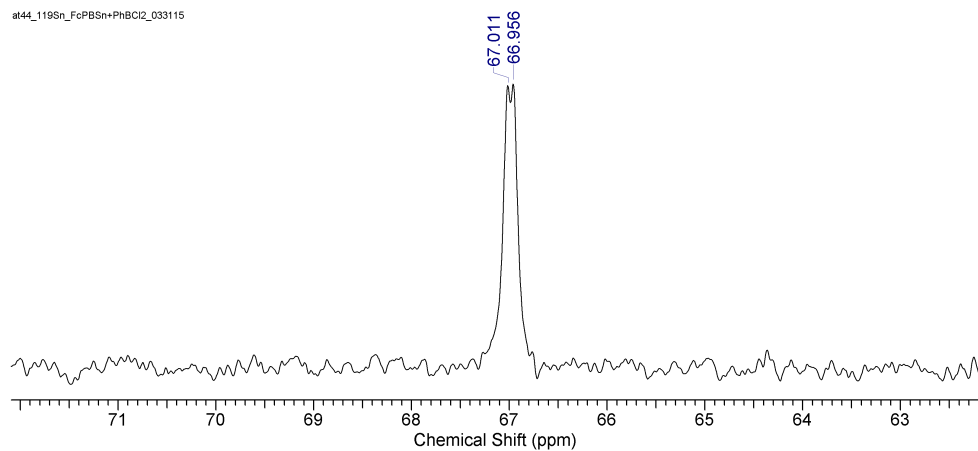

**Figure S11.**  $^{119}\text{Sn}$  NMR spectrum of (pS)-4.

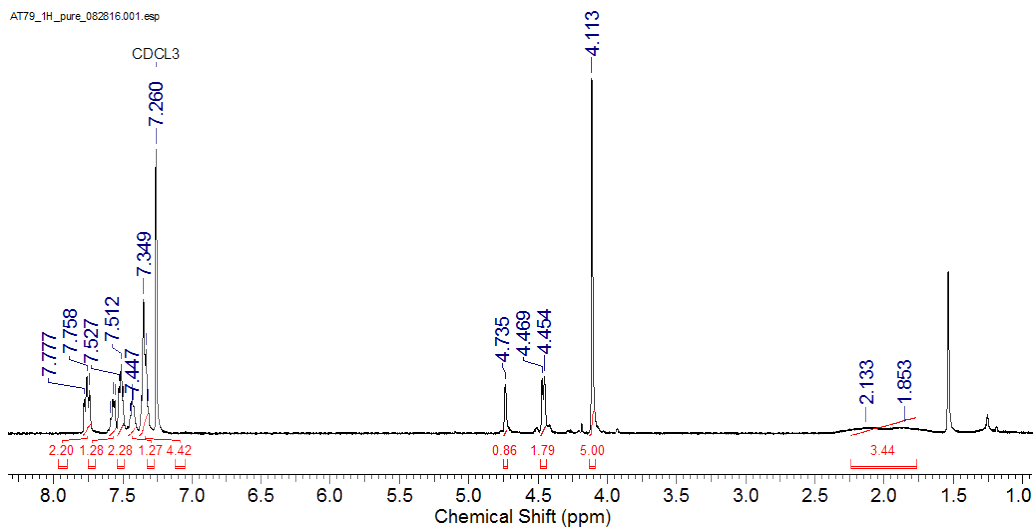

Figure S12a.  $^1\text{H}$  NMR spectrum of *rac*-5.

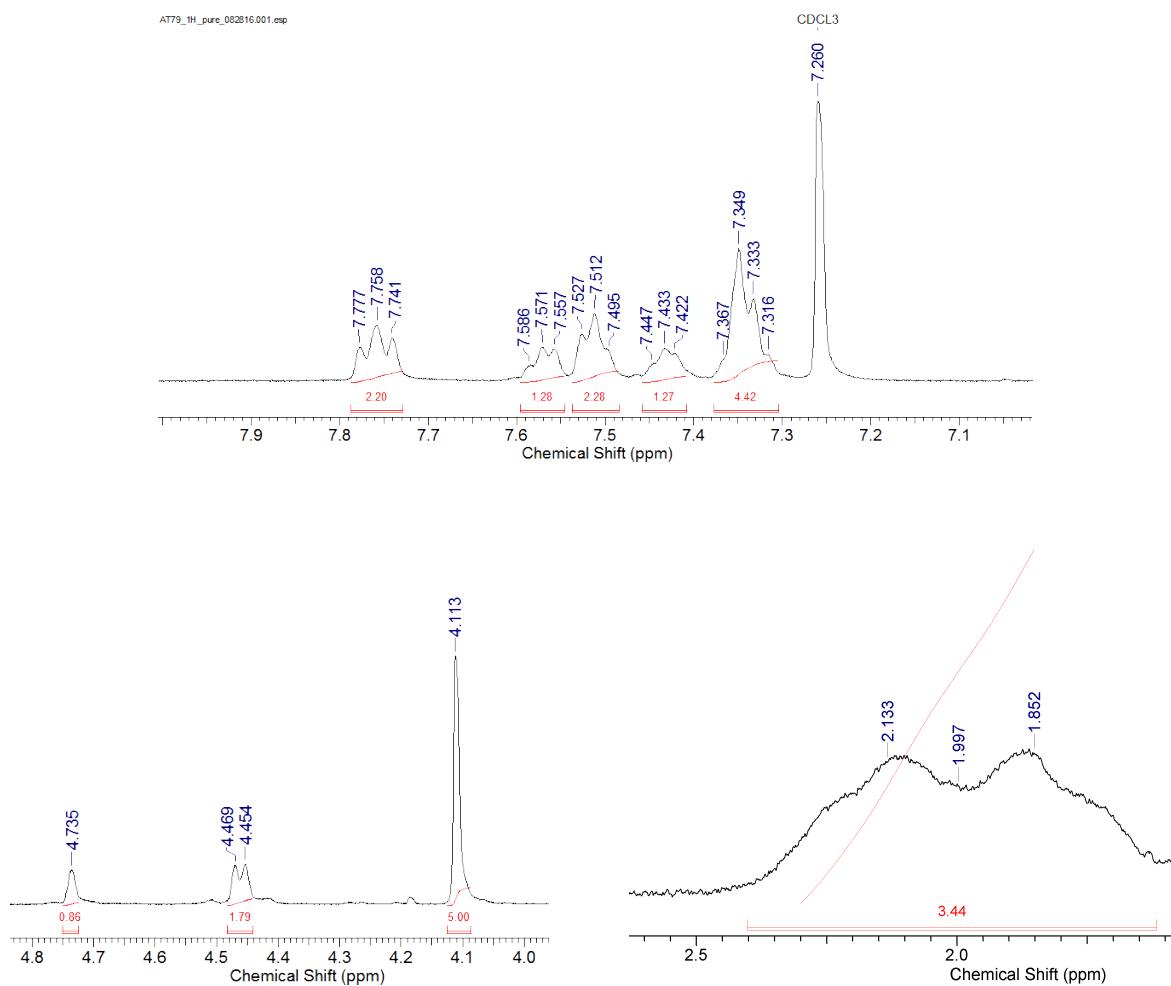

Figure S12b. Expansions of the  $^1\text{H}$  NMR spectrum of *rac*-5.

at79\_pure\_13c\_102815

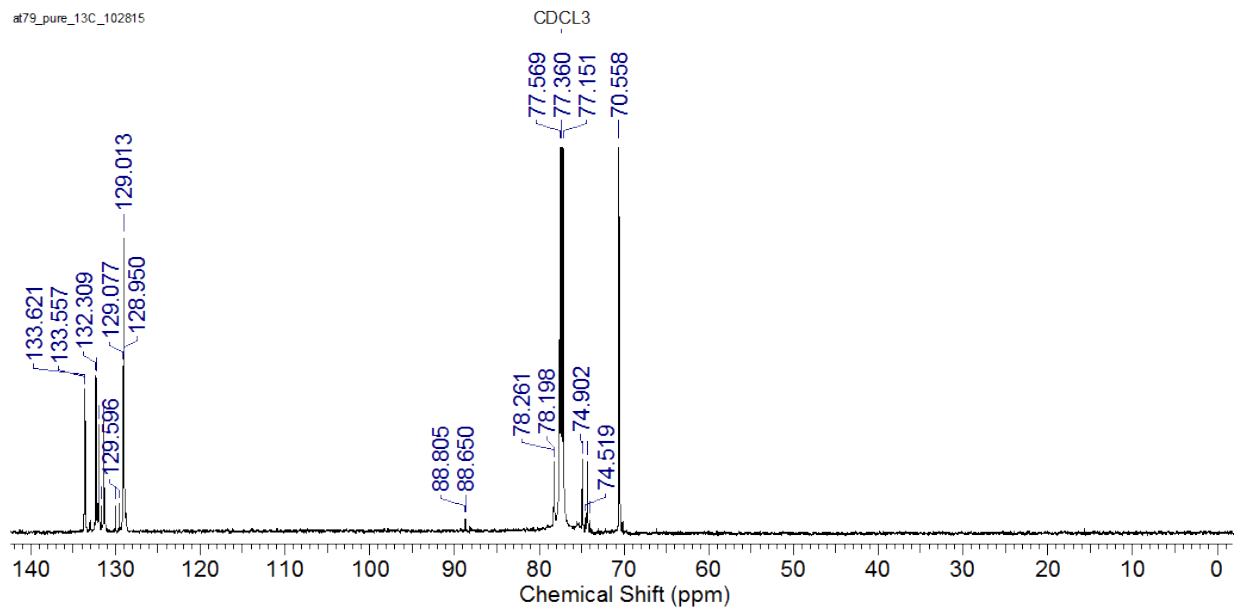

Figure S13a.  $^{13}\text{C}$  NMR spectrum of *rac*-5.

at79\_pure\_13c\_102815

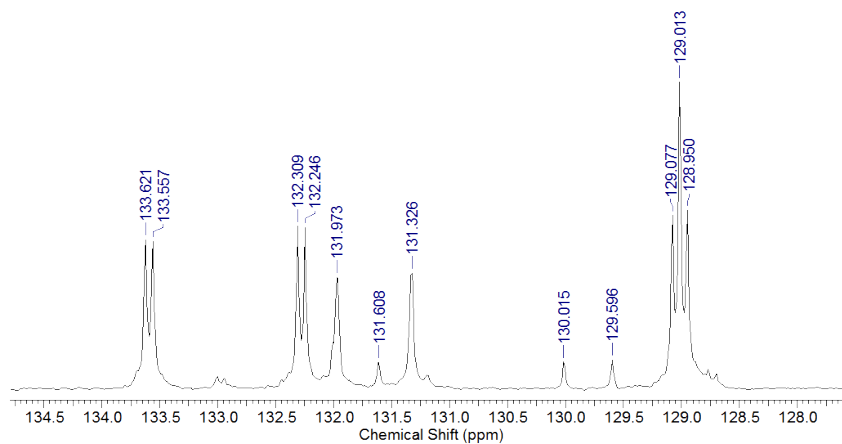

at79\_pure\_13c\_102815

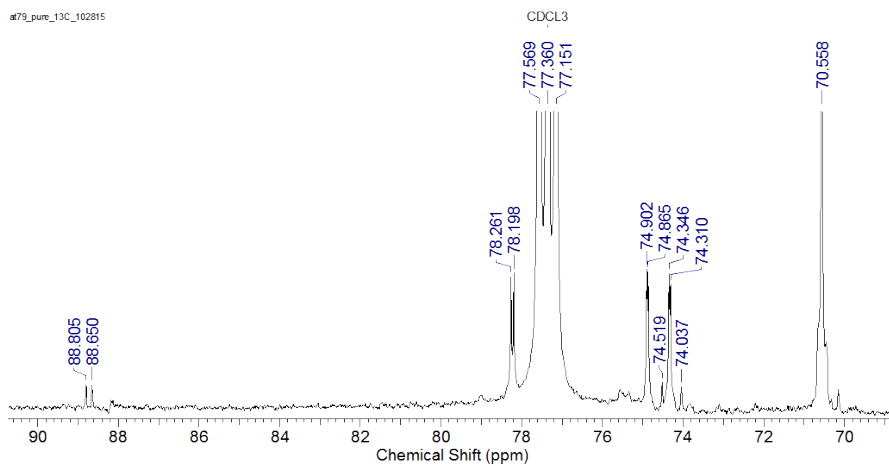

Figure S13b. Expansions of the  $^{13}\text{C}$  NMR spectrum of *rac*-5.

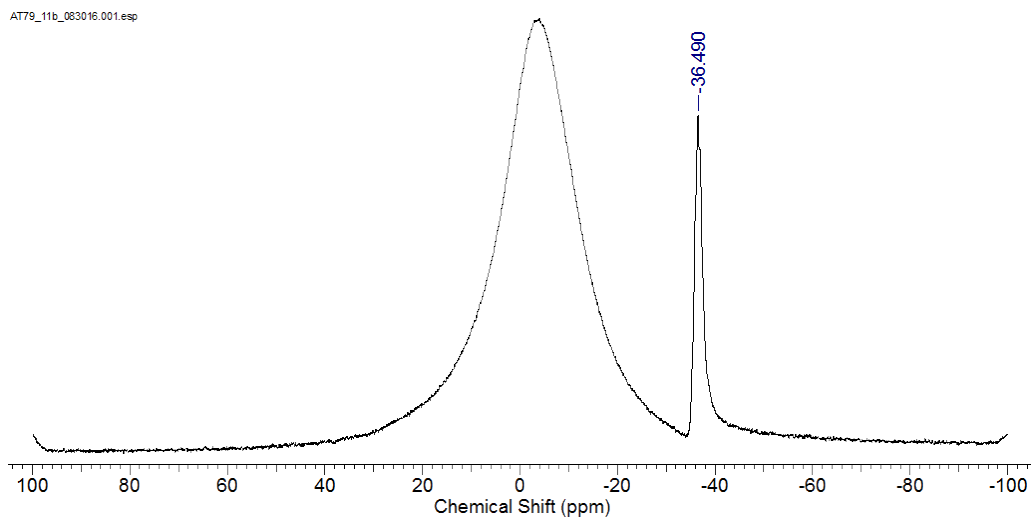

**Figure S14.**  $^{11}\text{B}$  NMR spectrum of *rac-5*.

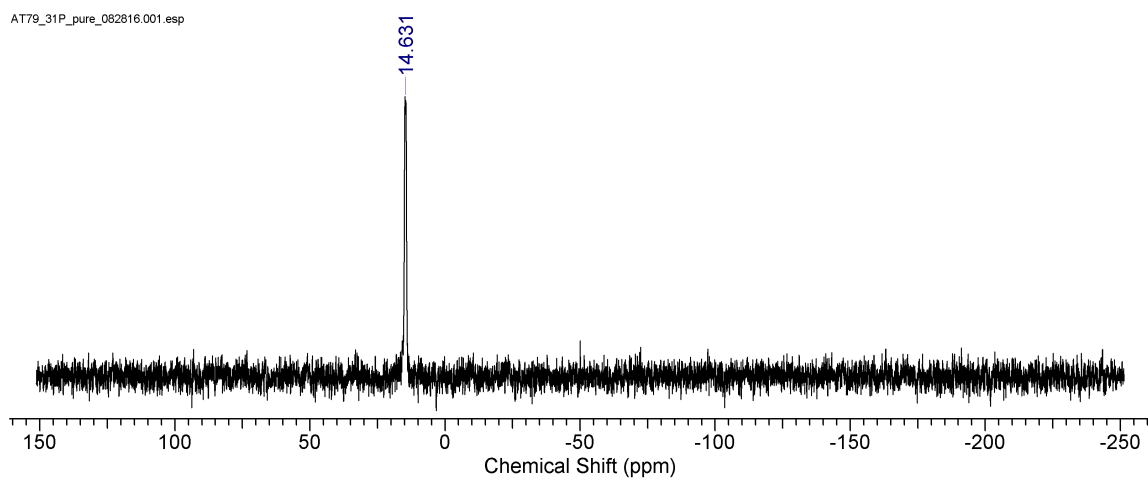

**Figure S15.**  $^{31}\text{P}$  NMR spectrum of *rac-5*.

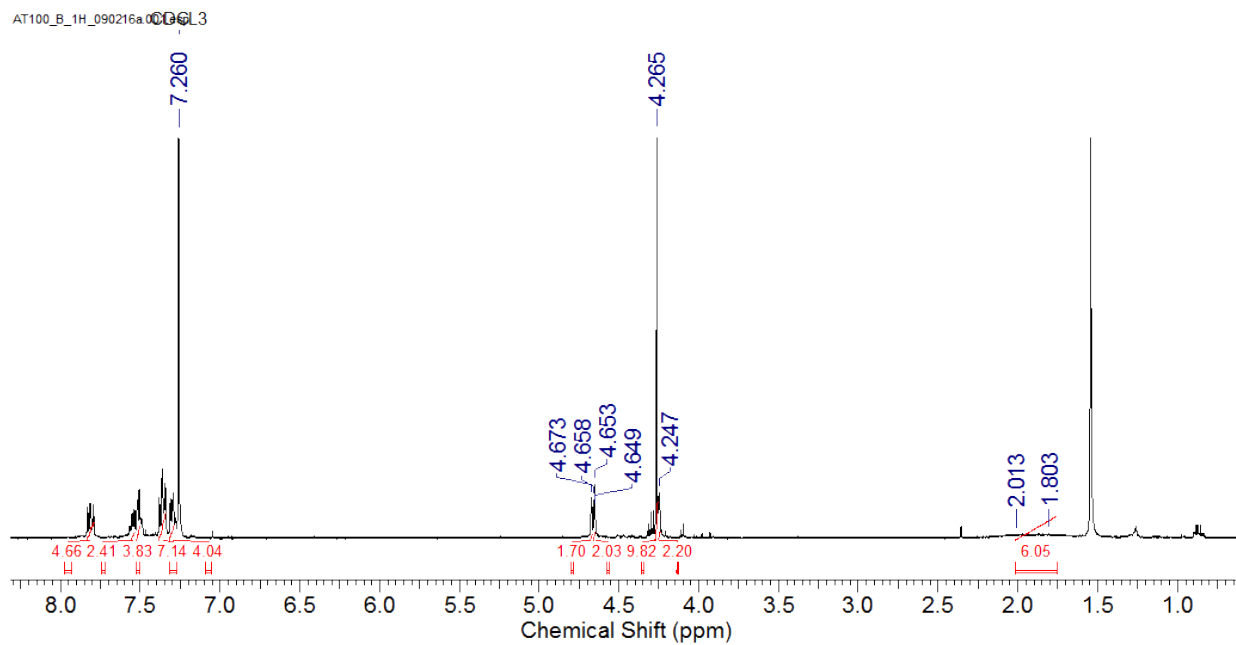

**Figure S16a.**  $^1\text{H}$  NMR spectrum of (pSpS)-6.

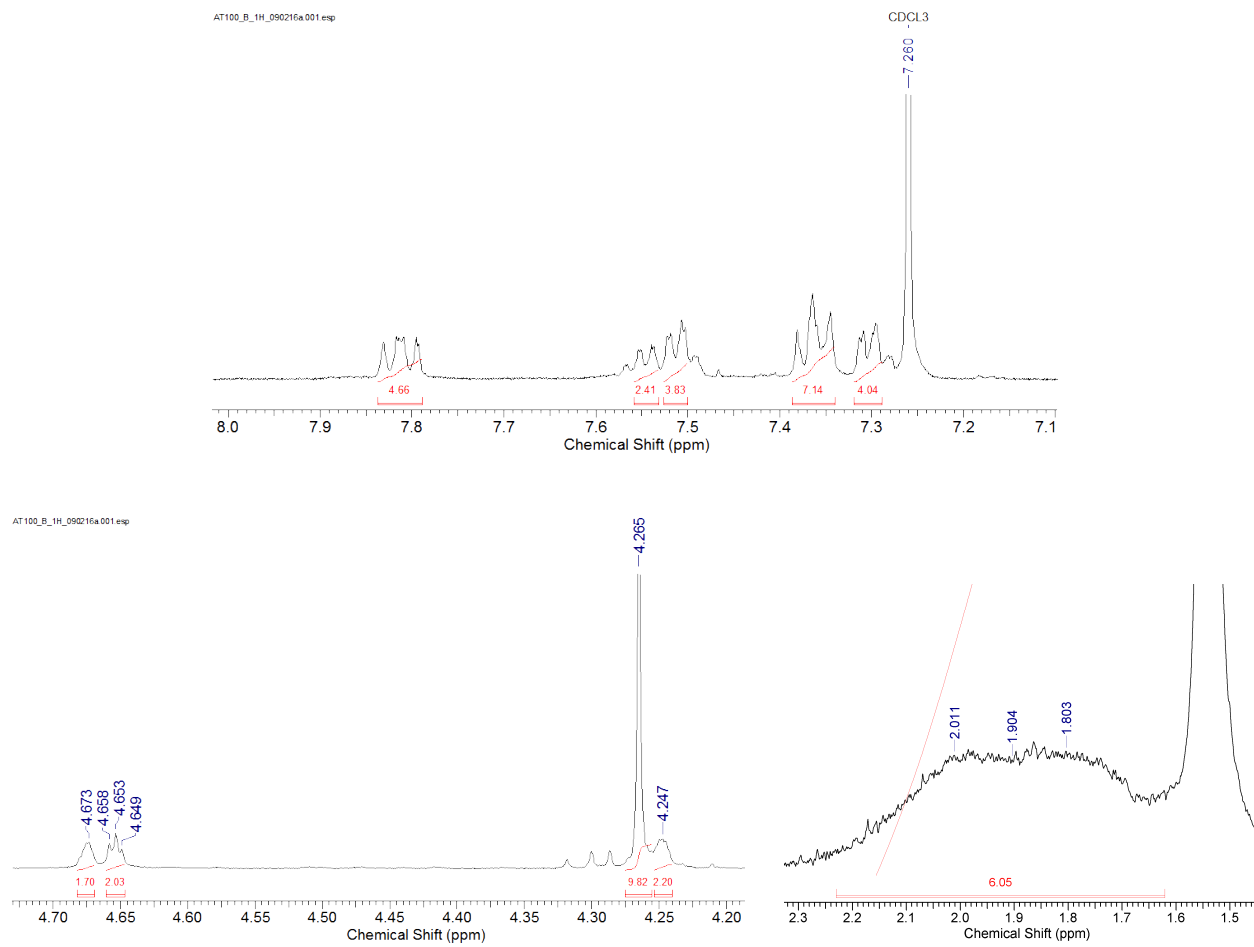

**Figure S16b.** Expansions of the  $^1\text{H}$  NMR spectrum of (pSpS)-6.

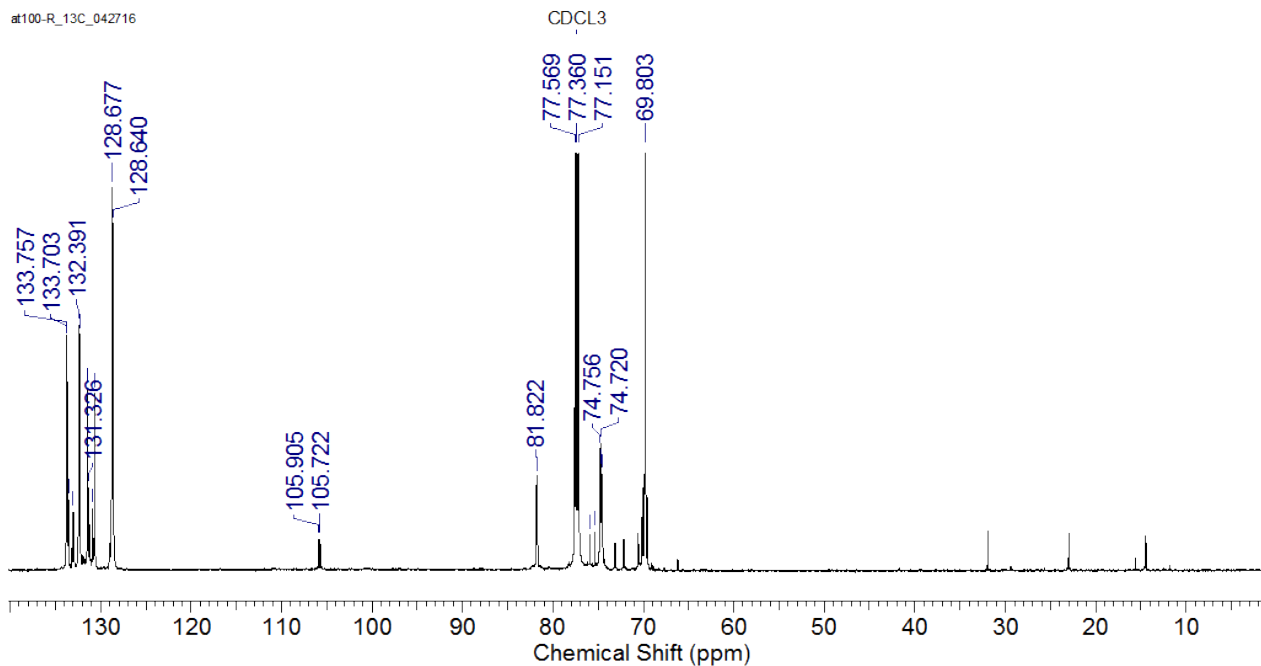

**Figure S17a.** <sup>13</sup>C NMR spectrum of (pSpS)-6.

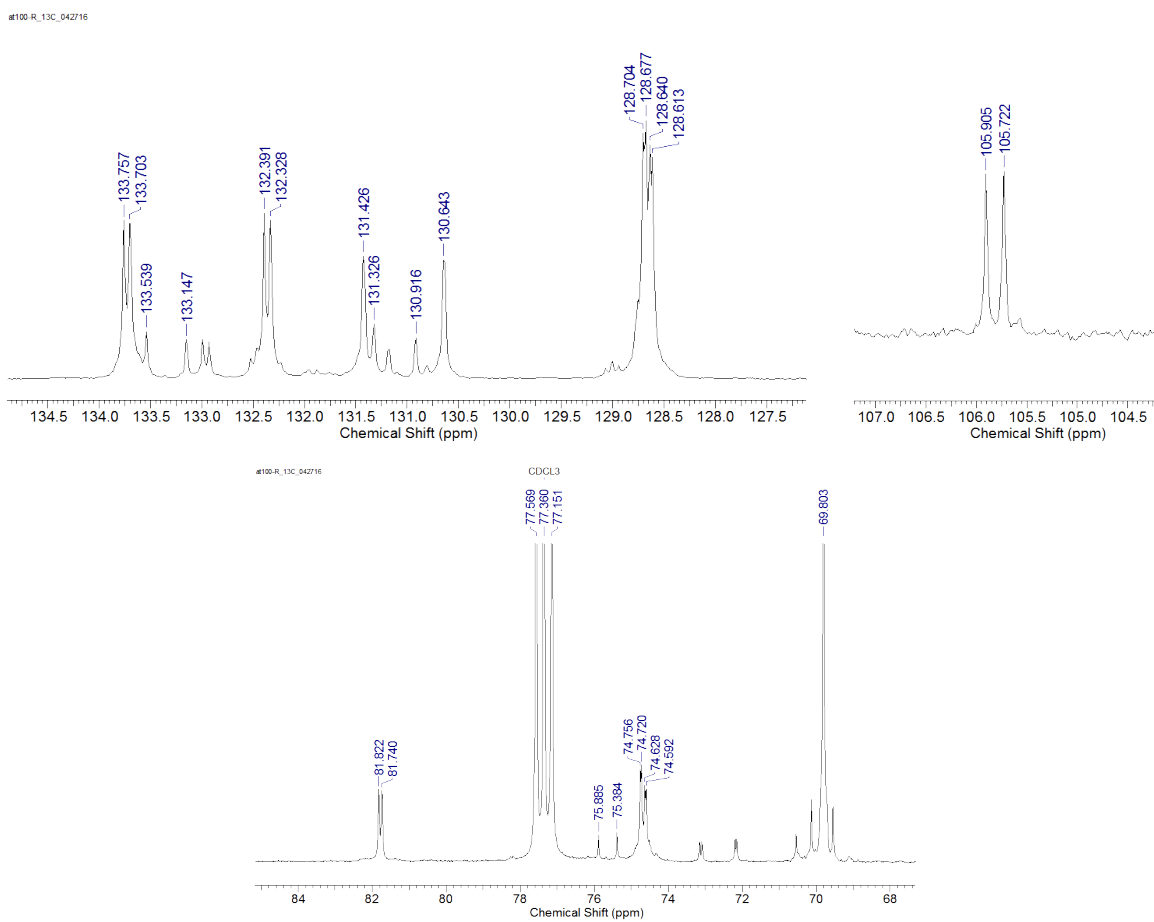

**Figure S17b.** Expansions of the <sup>13</sup>C NMR spectrum of (pSpS)-6.

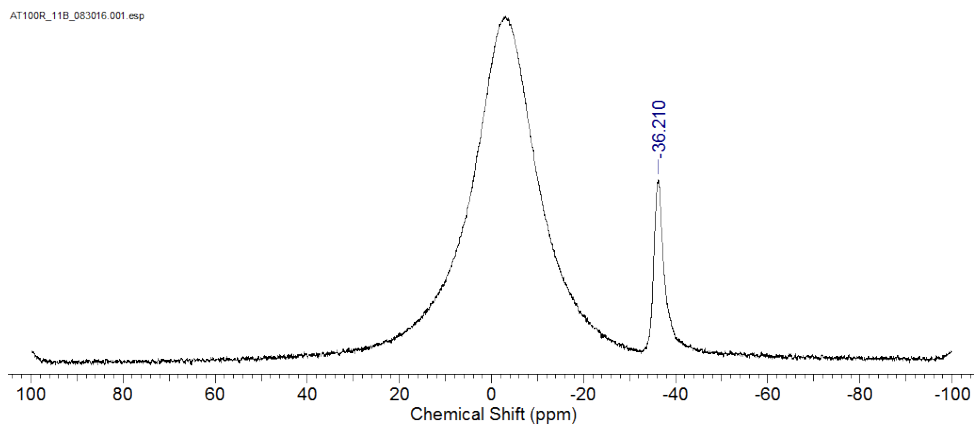

**Figure S18.**  $^{11}\text{B}$  NMR spectrum of (pSpS)-6.

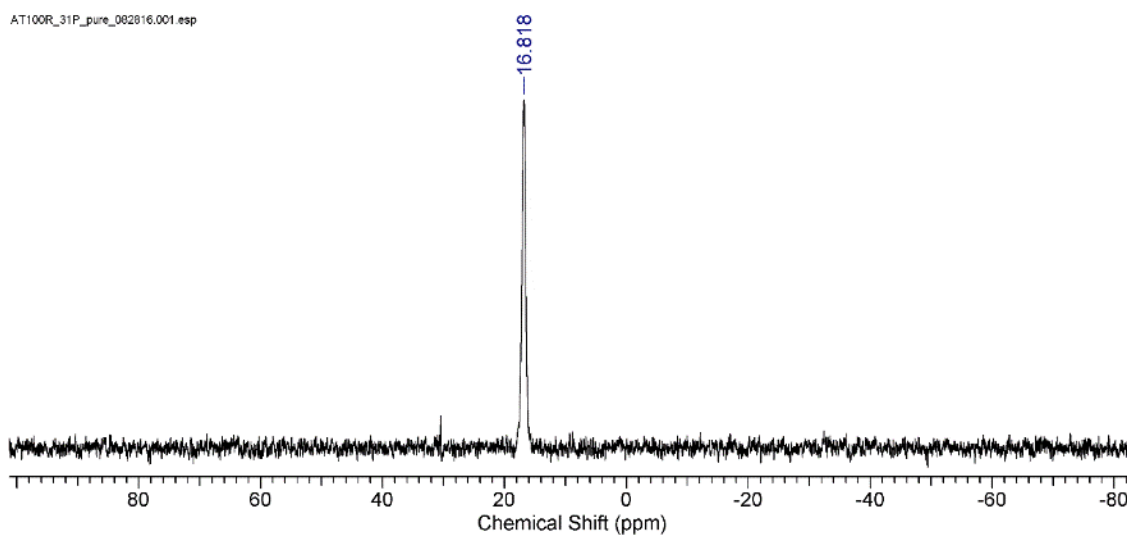

**Figure S19.**  $^{31}\text{P}$  NMR spectrum of (pSpS)-6.

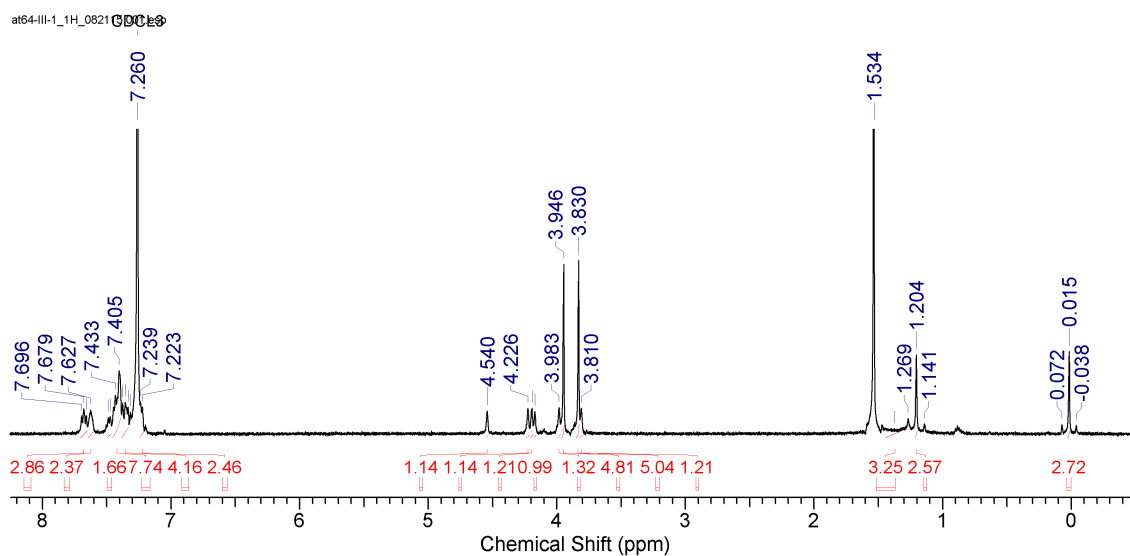

**Figure S20a.**  $^1\text{H}$  NMR spectrum of (pSpS)-7.

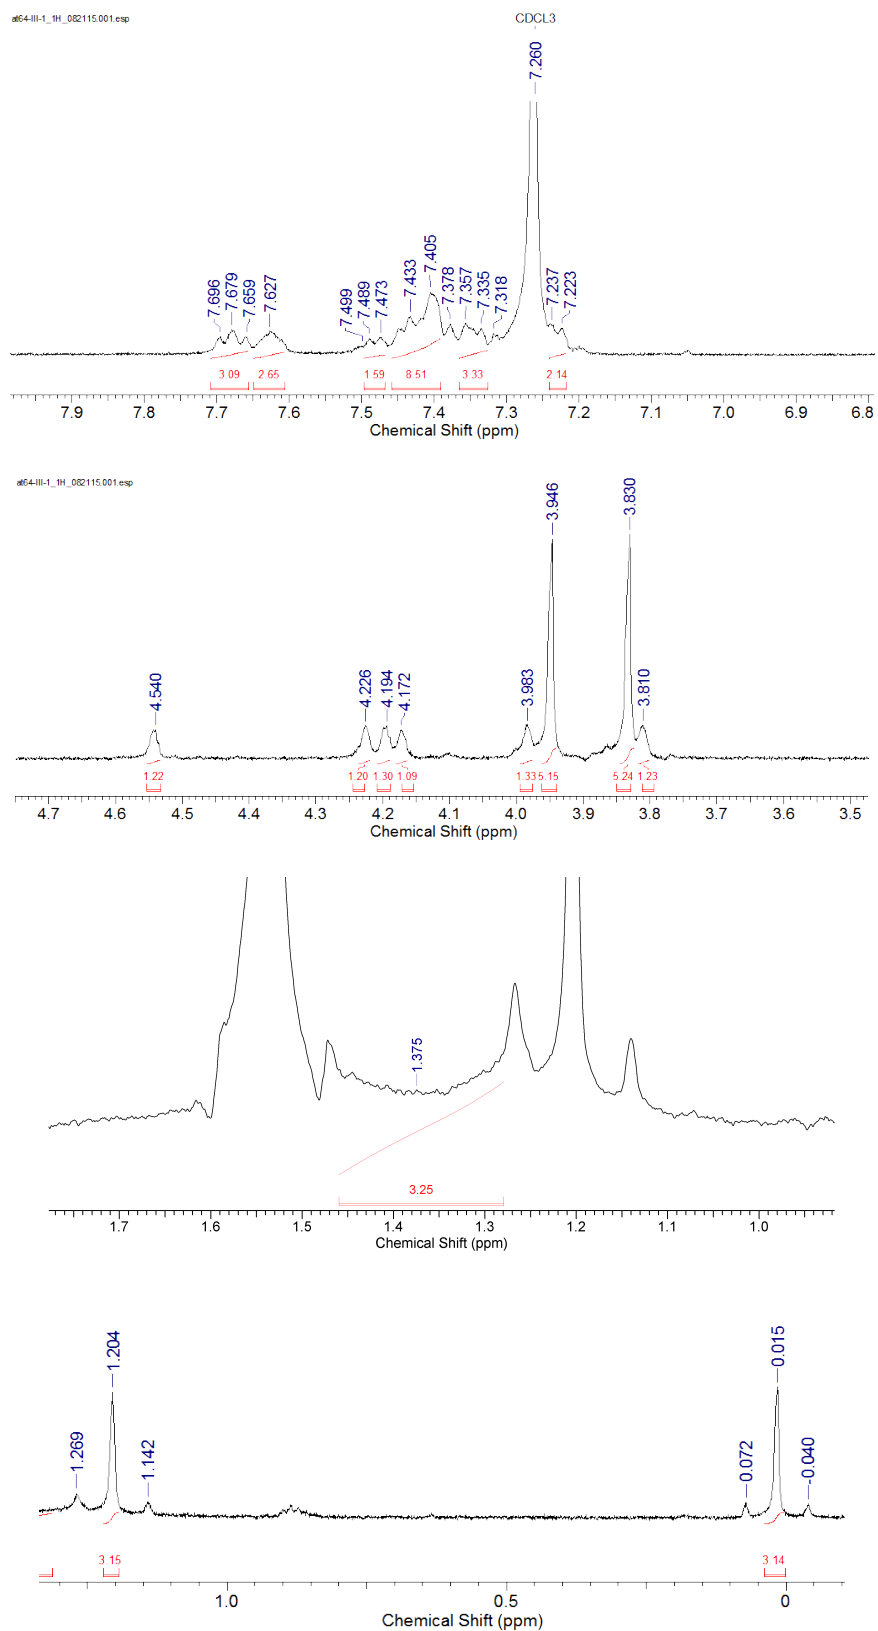

Figure S20b. Expansions of the  $^1\text{H}$  NMR spectrum of (pSpS)-7.



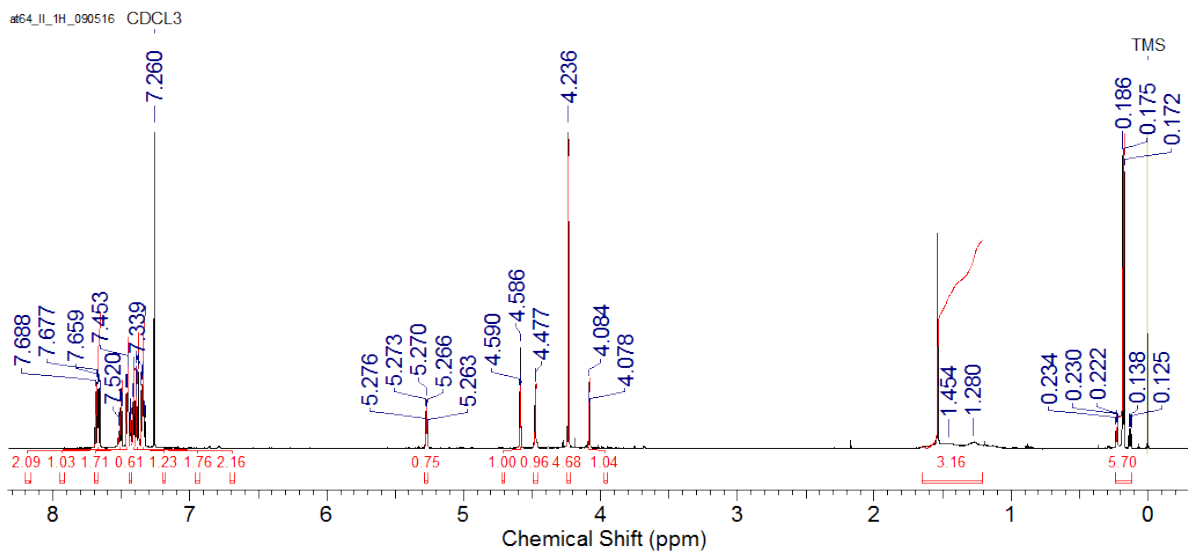

Figure S21a.  $^1\text{H}$  NMR spectrum of (pS)-8.

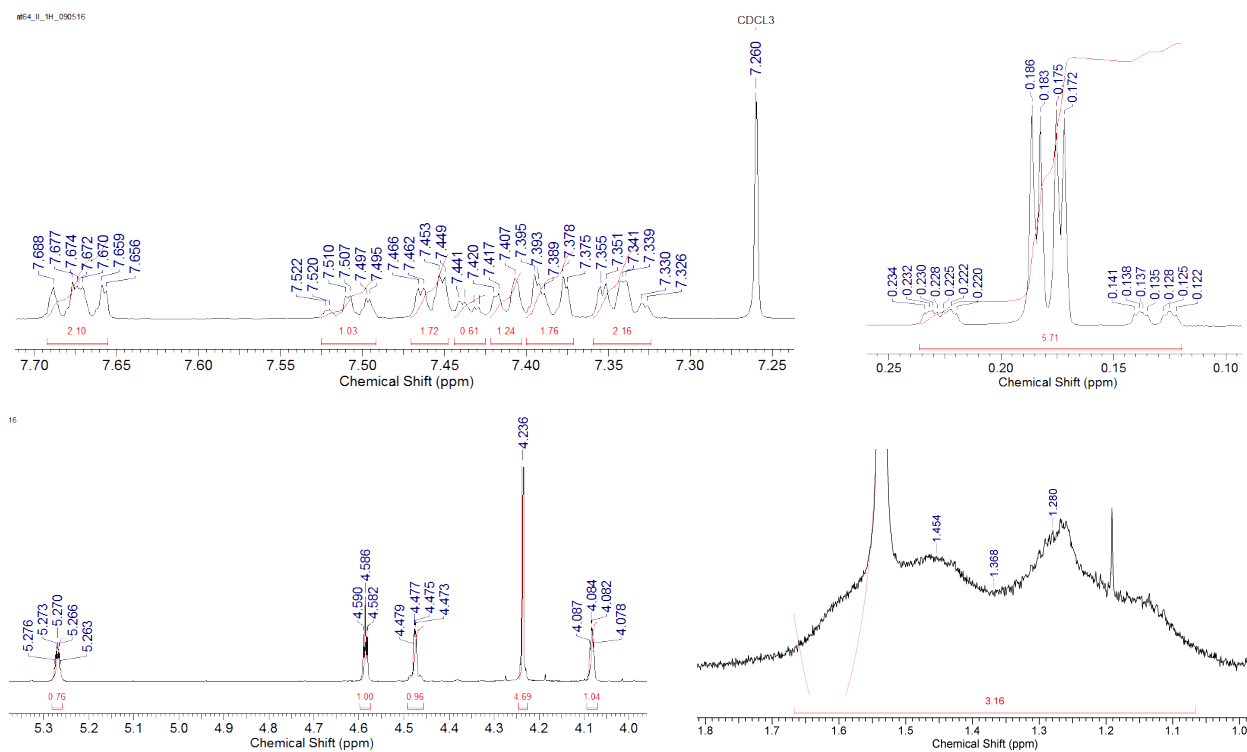

Figure S21b. Expansions of the  $^1\text{H}$  NMR spectrum of (pS)-8.

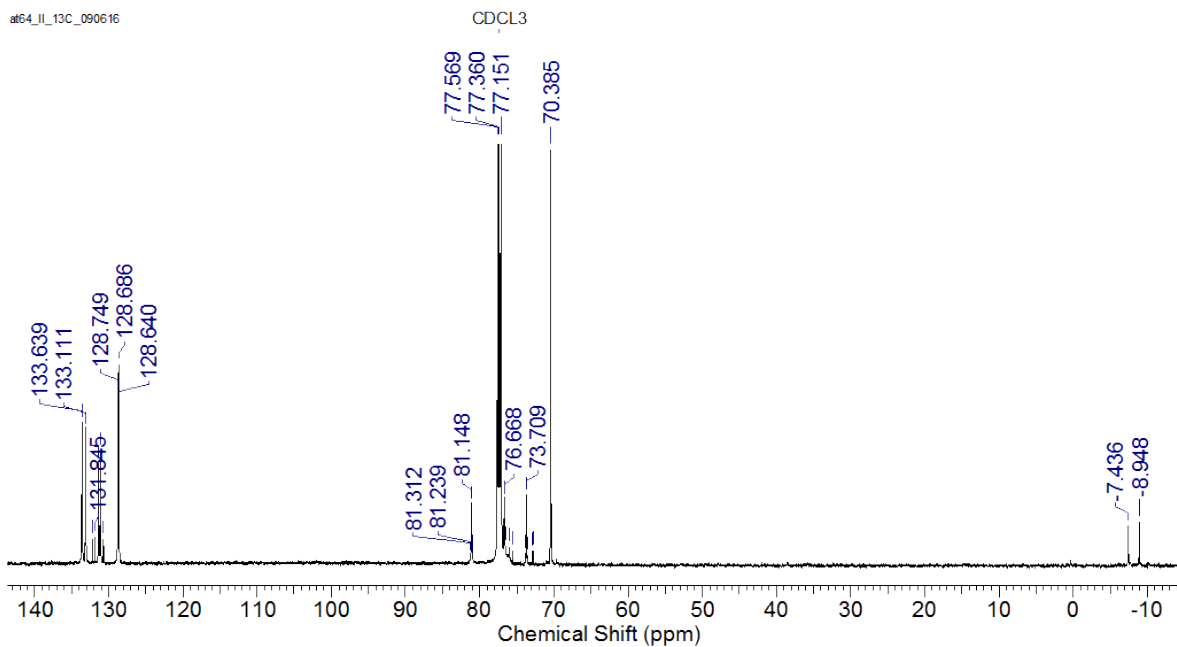

Figure S22a. <sup>13</sup>C NMR spectrum of (pS)-8.

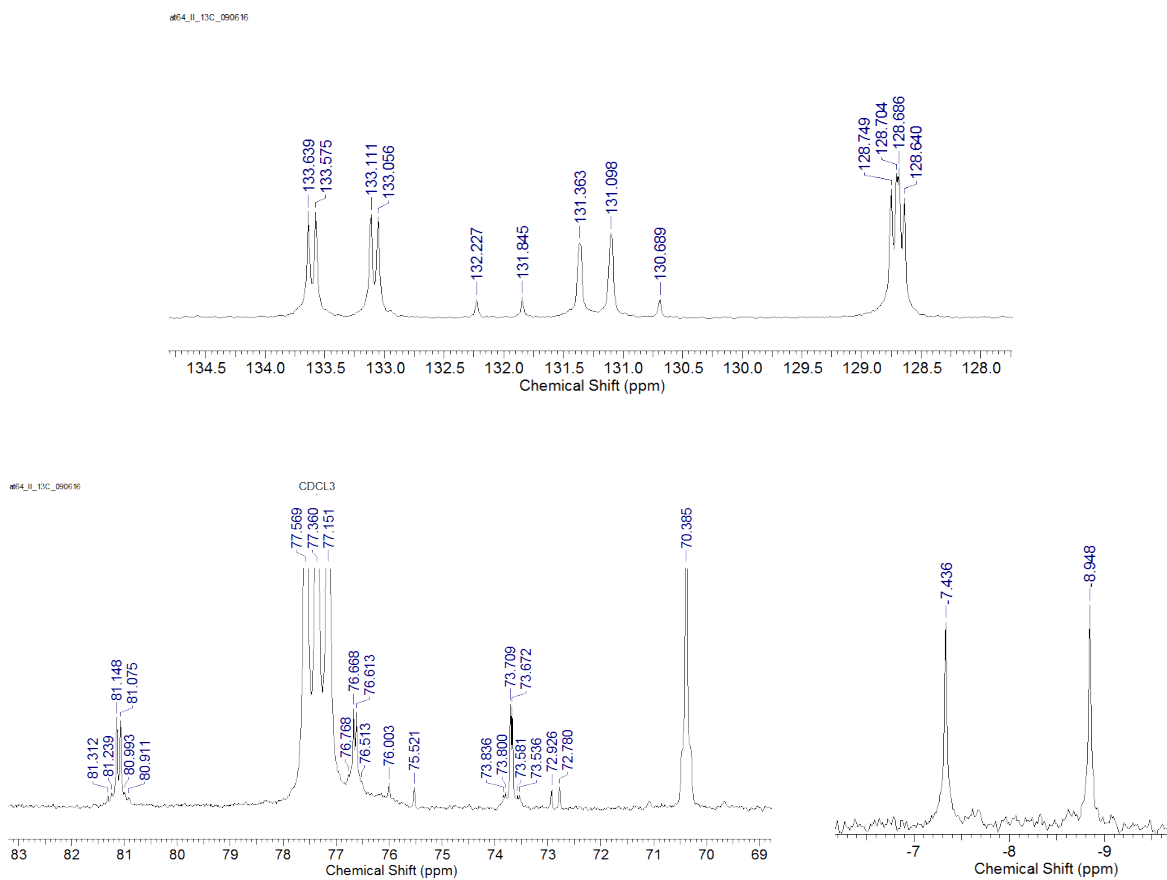

Figure S22b. Expansions of the <sup>13</sup>C NMR spectrum of (pS)-8.

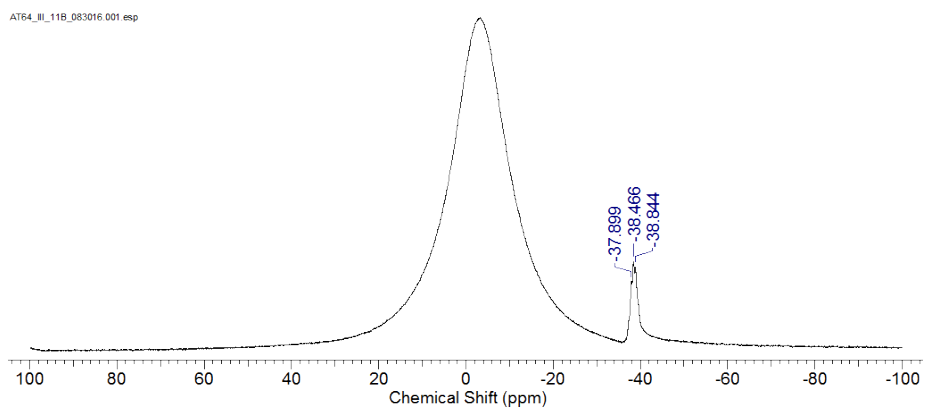

**Figure S23.** <sup>11</sup>B NMR spectrum of (pS)-8.

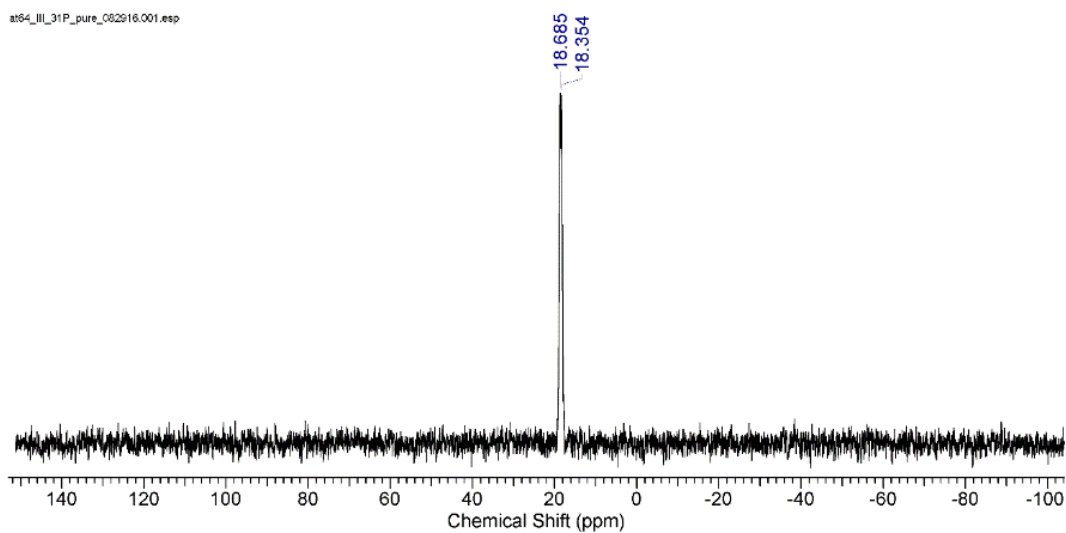

**Figure S24.** <sup>31</sup>P NMR spectrum of (pS)-8.

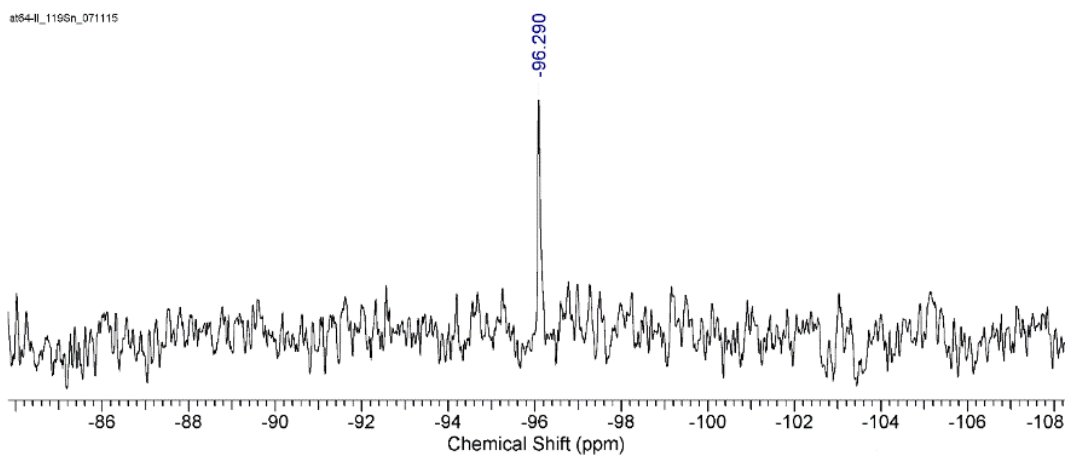

**Figure S25.** <sup>119</sup>Sn NMR spectrum of (pS)-8.

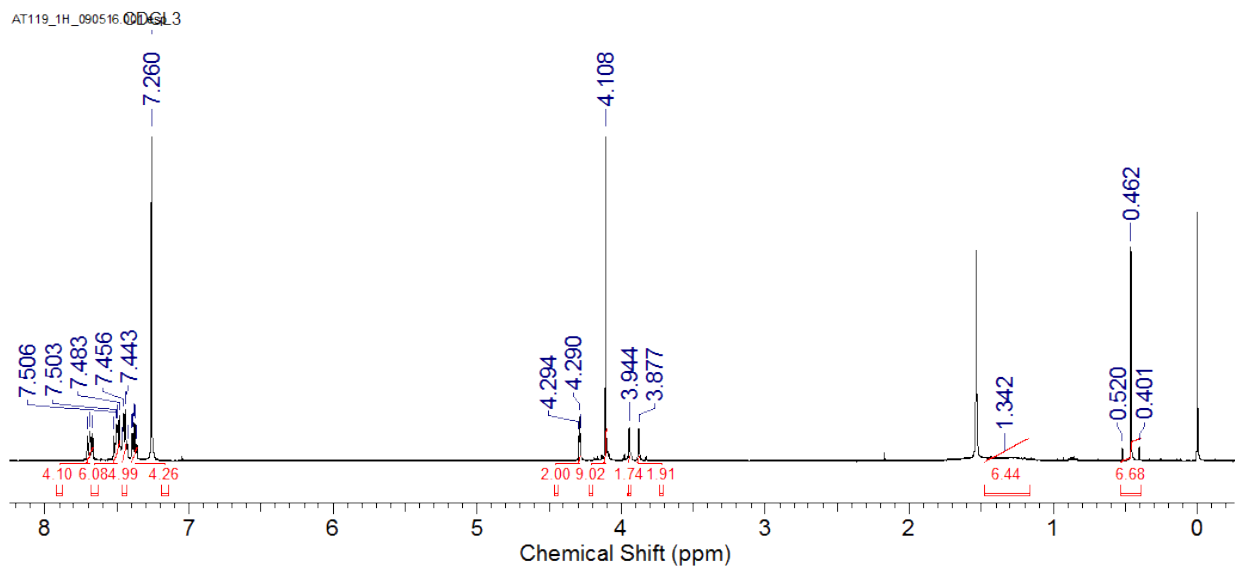

Figure S26a.  $^1\text{H}$  NMR spectrum of (pRpR)-10.

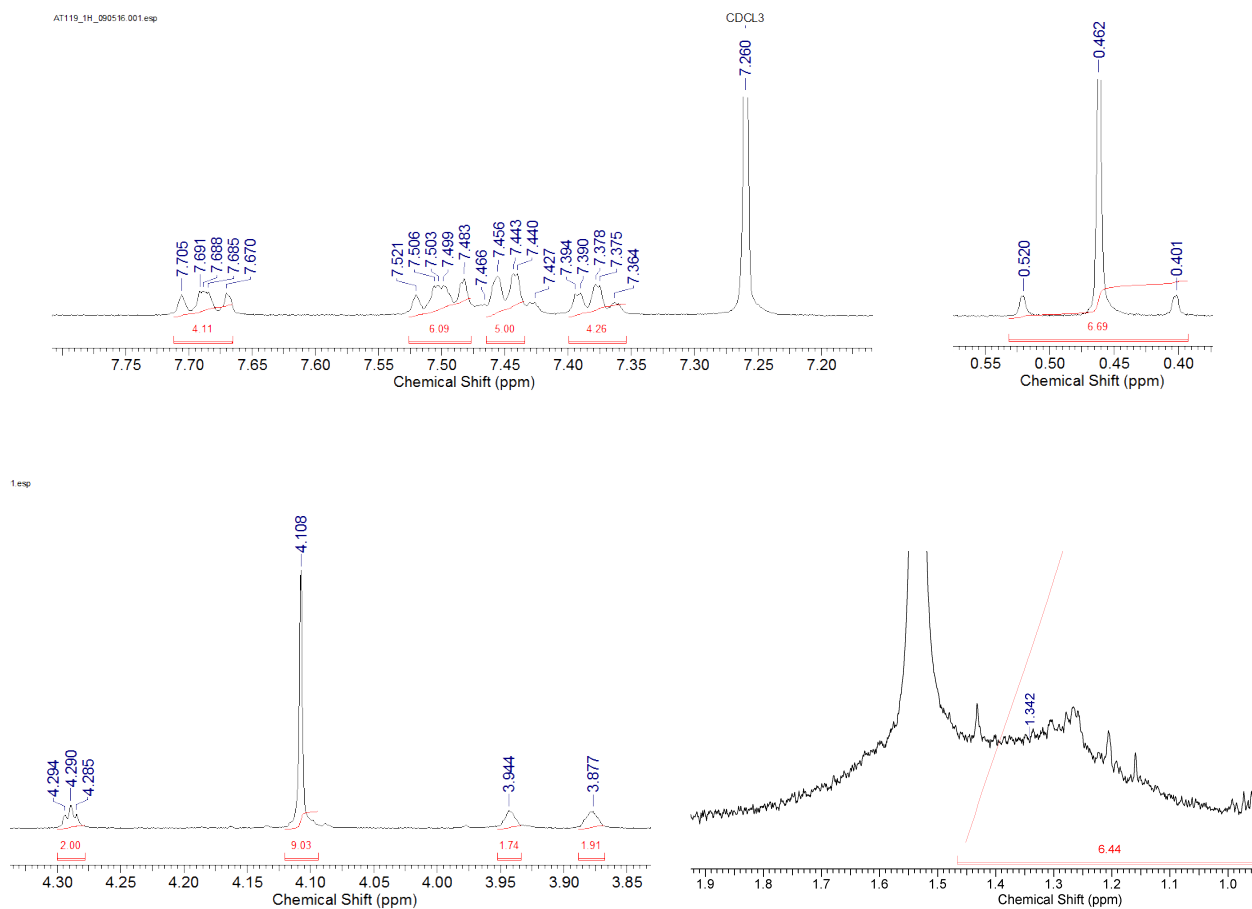

Figure S26b. Expansions of the  $^1\text{H}$  NMR spectrum of (pRpR)-10.

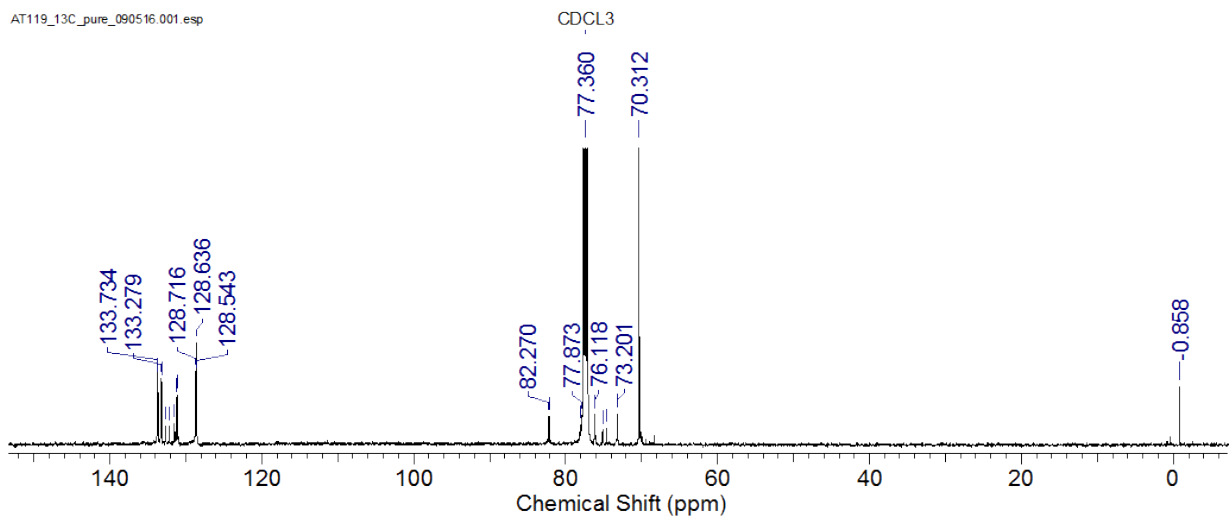

Figure S27a. <sup>13</sup>C NMR spectrum of (pRpR)-10.

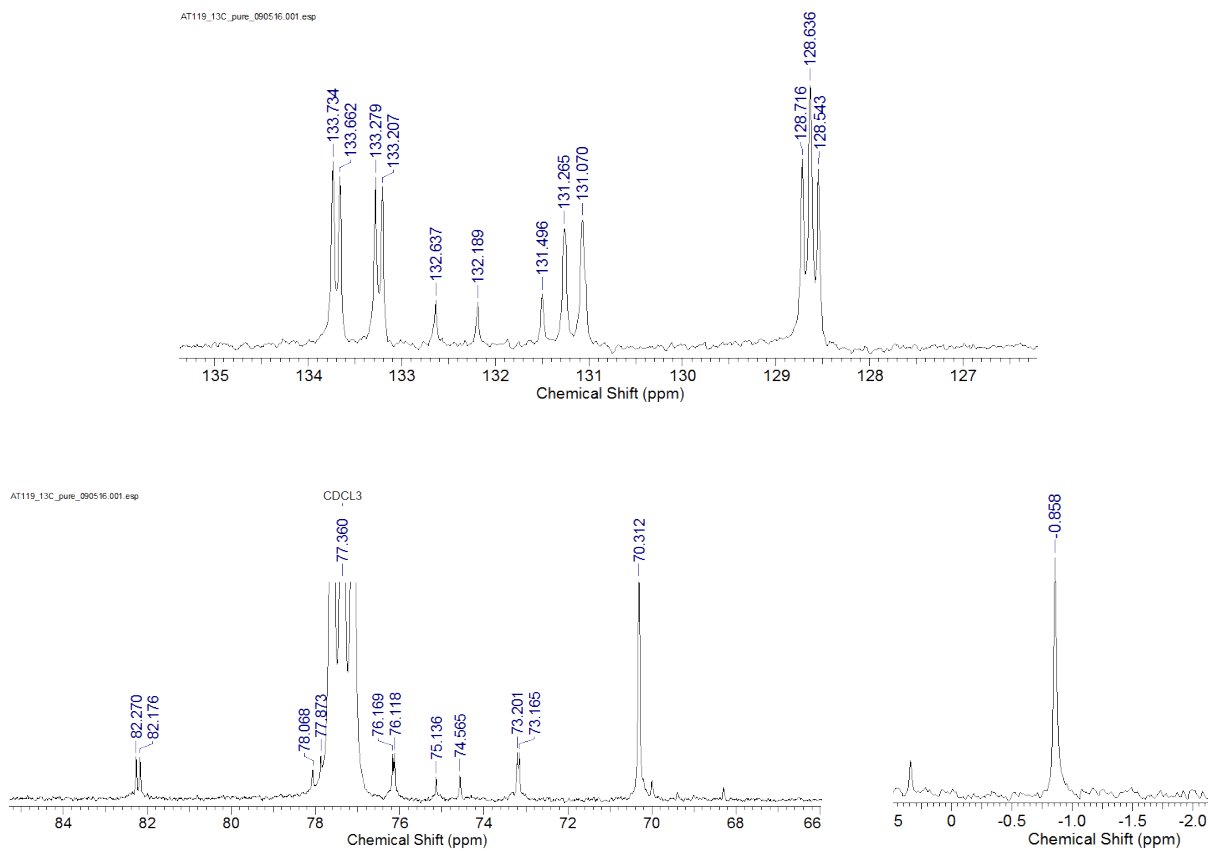

Figure S27b. Expansions of the <sup>13</sup>C NMR spectrum of (pRpR)-10.

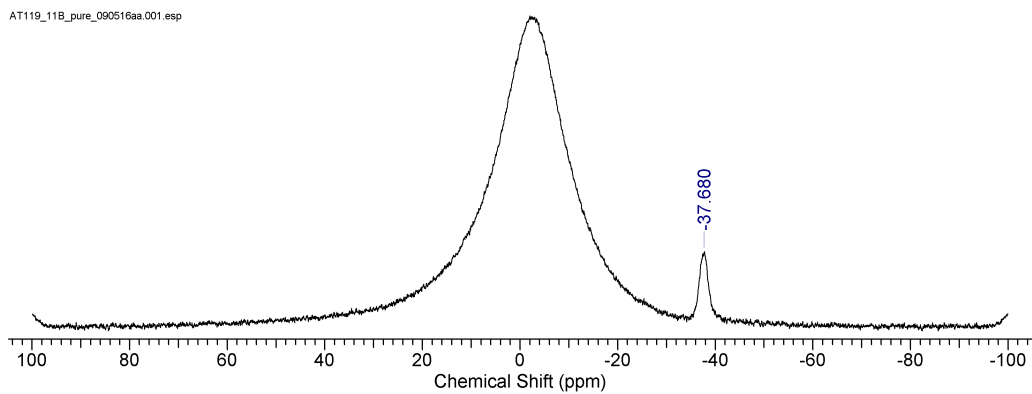

**Figure S28.**  $^{11}\text{B}$  NMR spectrum of (pRpR)-10.

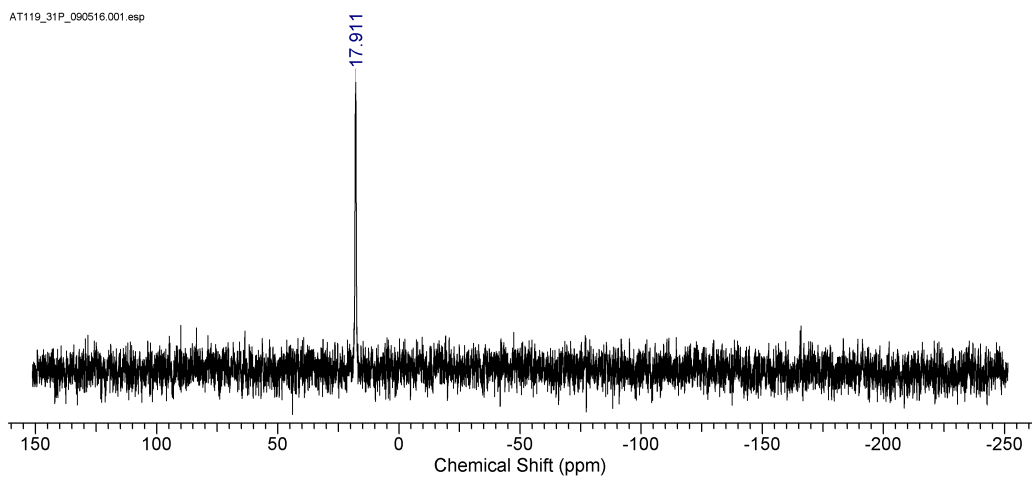

**Figure S29.**  $^{31}\text{P}$  NMR spectrum of (pRpR)-10.

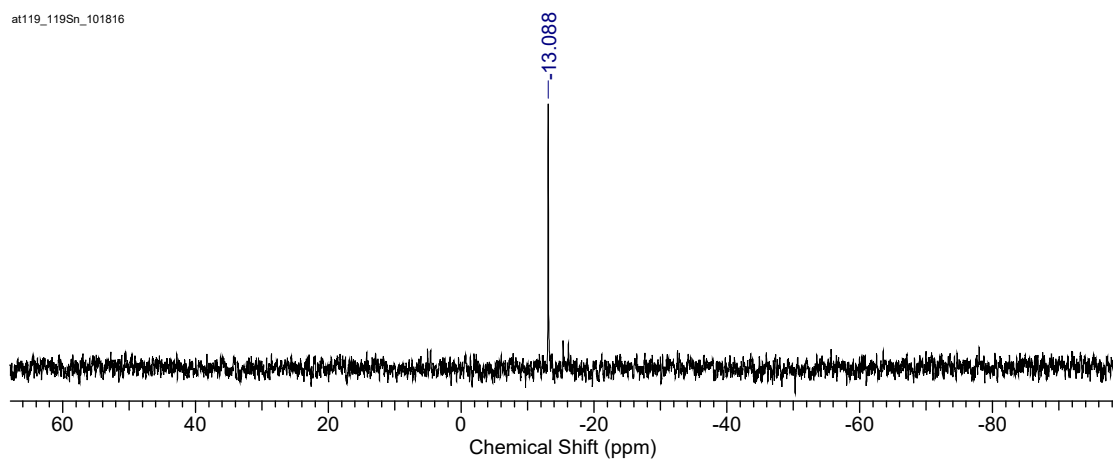

**Figure S30.**  $^{119}\text{Sn}$  NMR spectrum of (pRpR)-10.

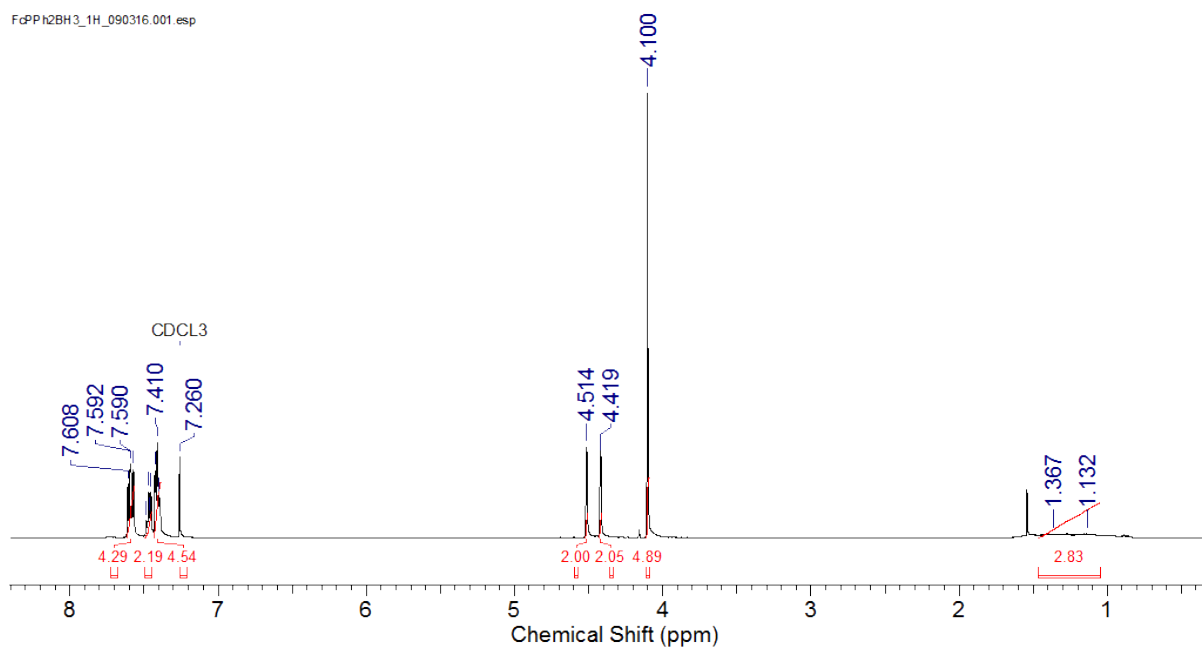

Figure S31a. <sup>1</sup>H NMR spectrum of FcPPt<sub>2</sub>·BH<sub>3</sub>.

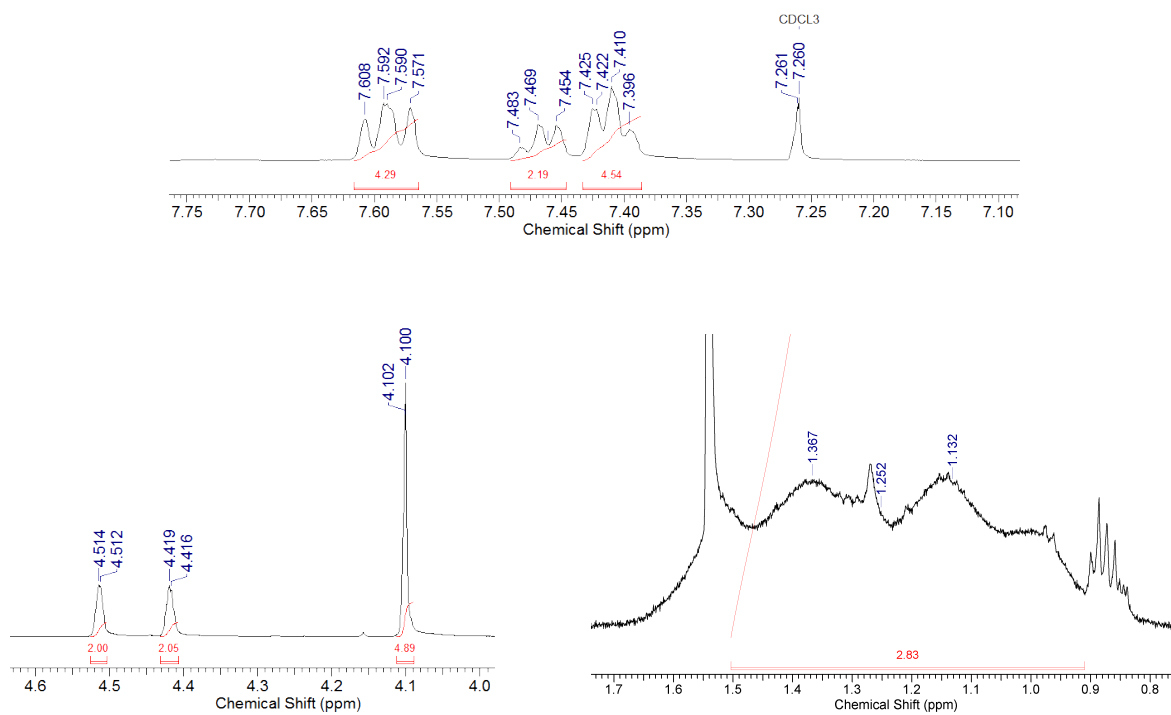

Figure S31b. Expansions of the <sup>1</sup>H NMR spectrum of FcPPt<sub>2</sub>·BH<sub>3</sub>.

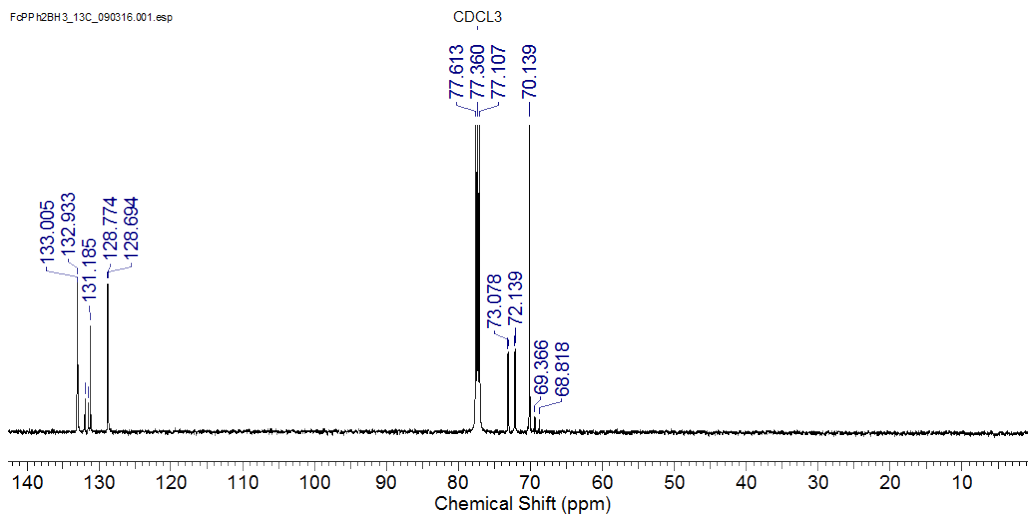

Figure S32a.  $^{13}\text{C}$  NMR spectrum of  $\text{FcPPH}_2\cdot\text{BH}_3$ .

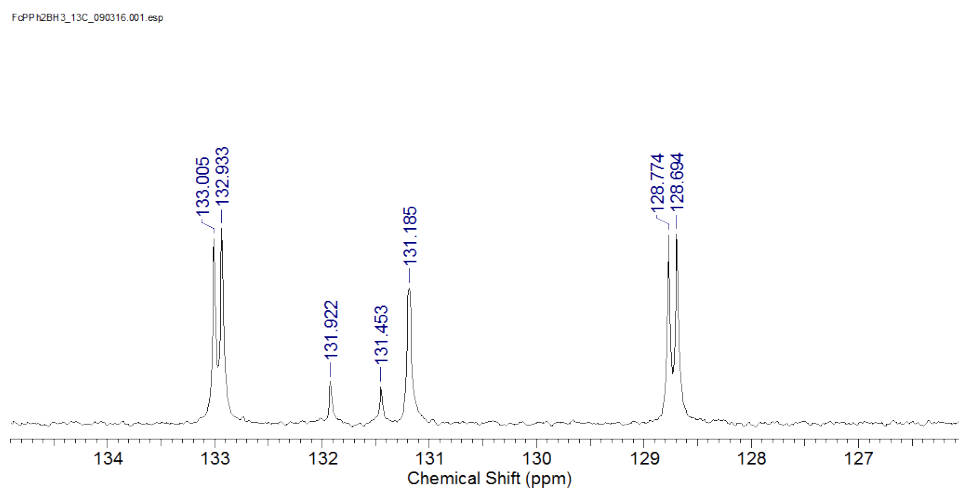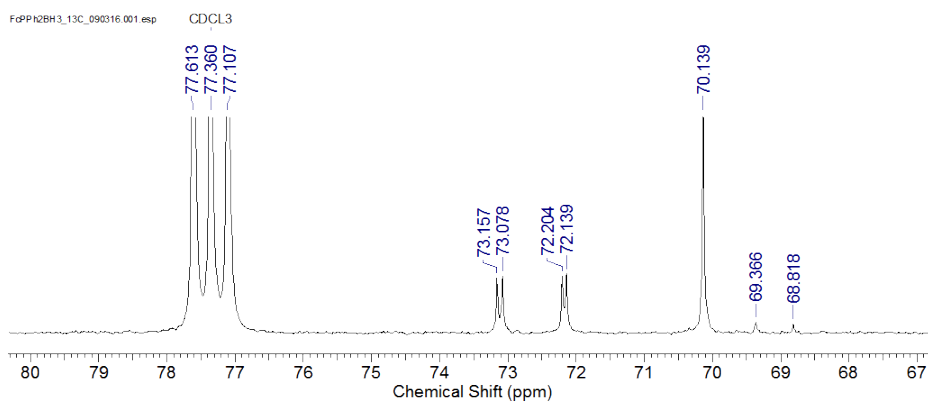

Figure S32b. Expansions of the  $^{13}\text{C}$  NMR spectrum of  $\text{FcPPH}_2\cdot\text{BH}_3$ .



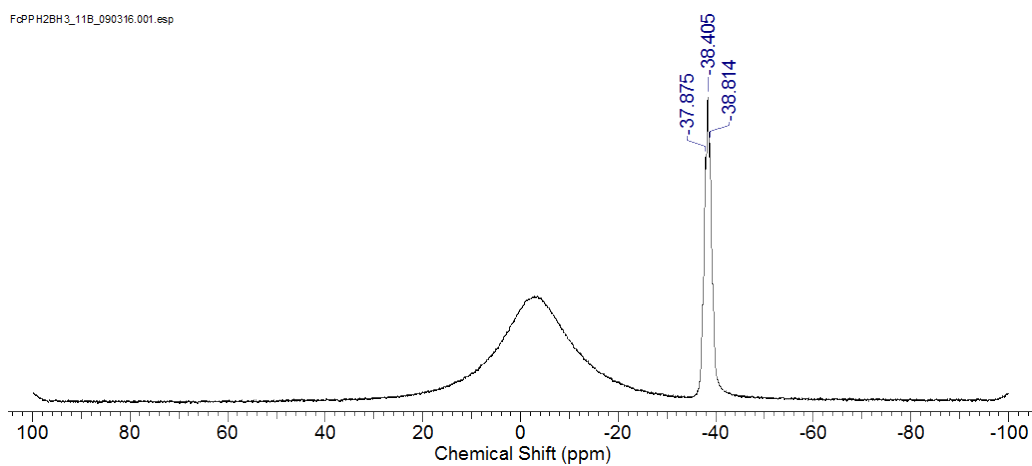

**Figure S33.**  $^{11}\text{B}$  NMR spectrum of  $\text{FcPPh}_2\cdot\text{BH}_3$ .

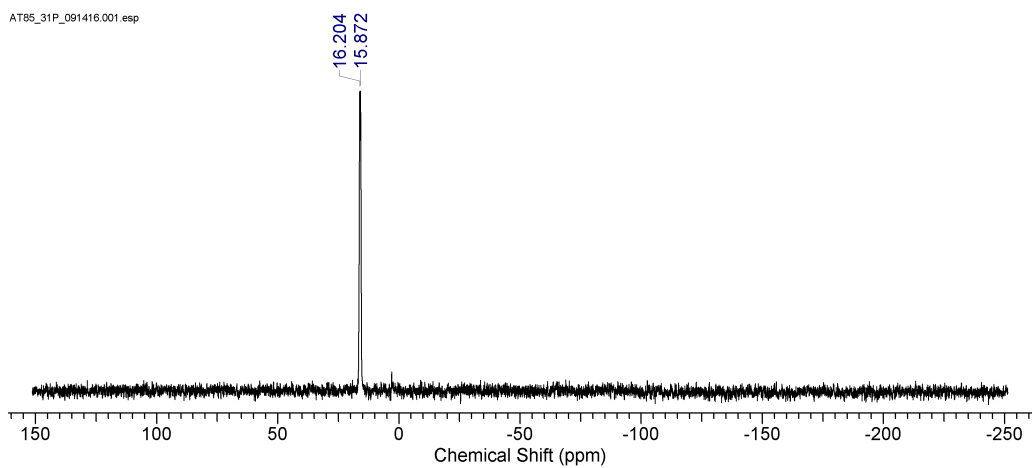

**Figure S34.**  $^{31}\text{P}$  NMR spectrum of  $\text{FcPPh}_2\cdot\text{BH}_3$ .

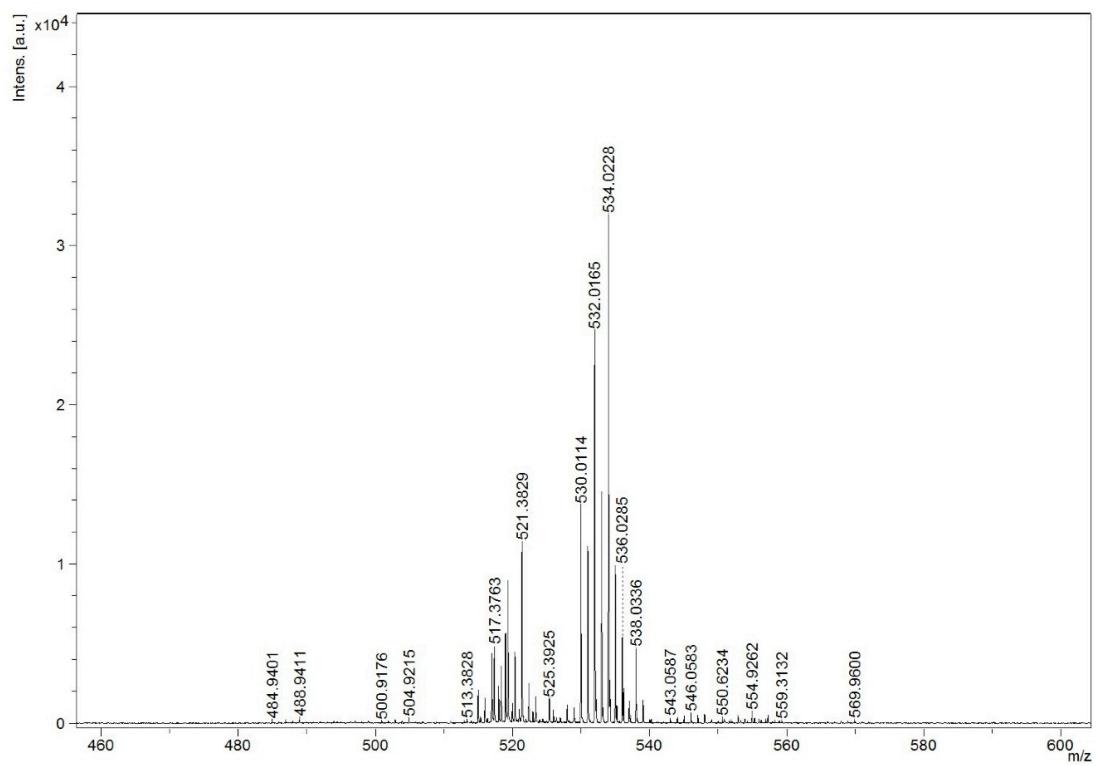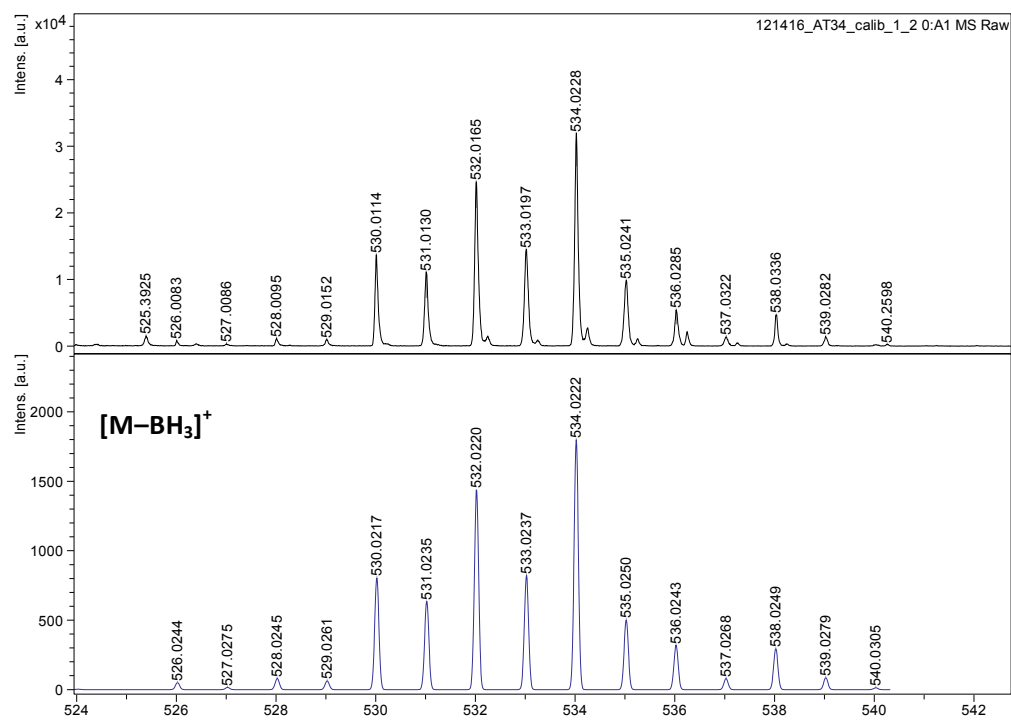

Figure S35. MALDI-TOF mass spectrum of (pS)-3.

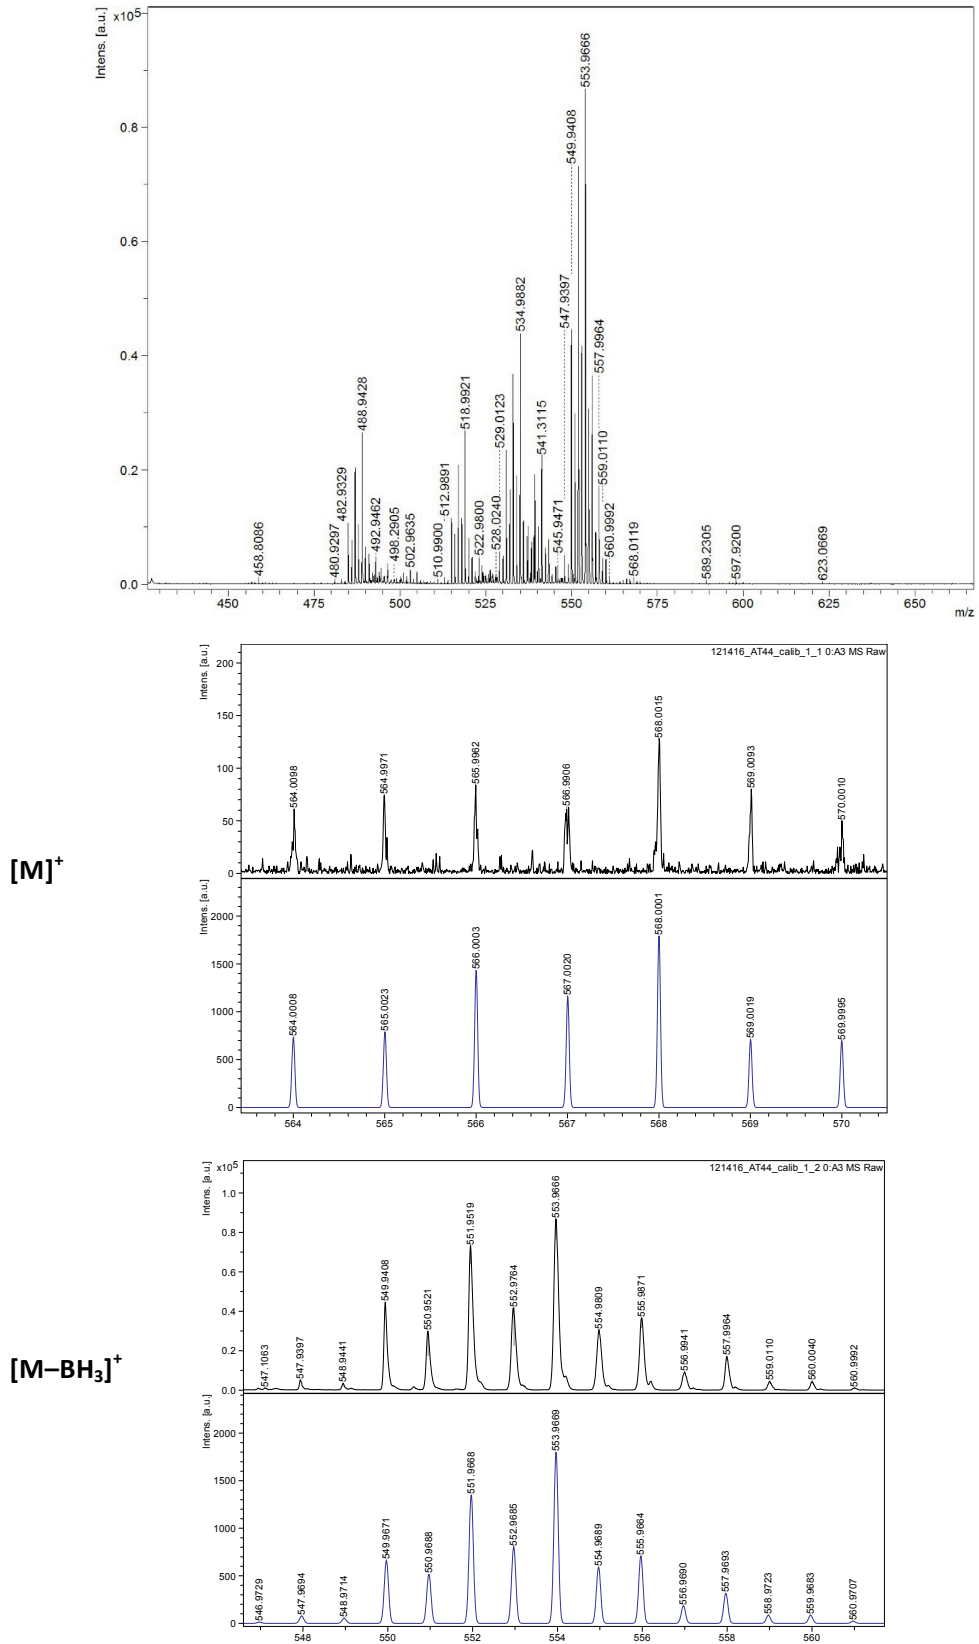

Figure S36. MALDI-TOF mass spectrum of (pS)-4.

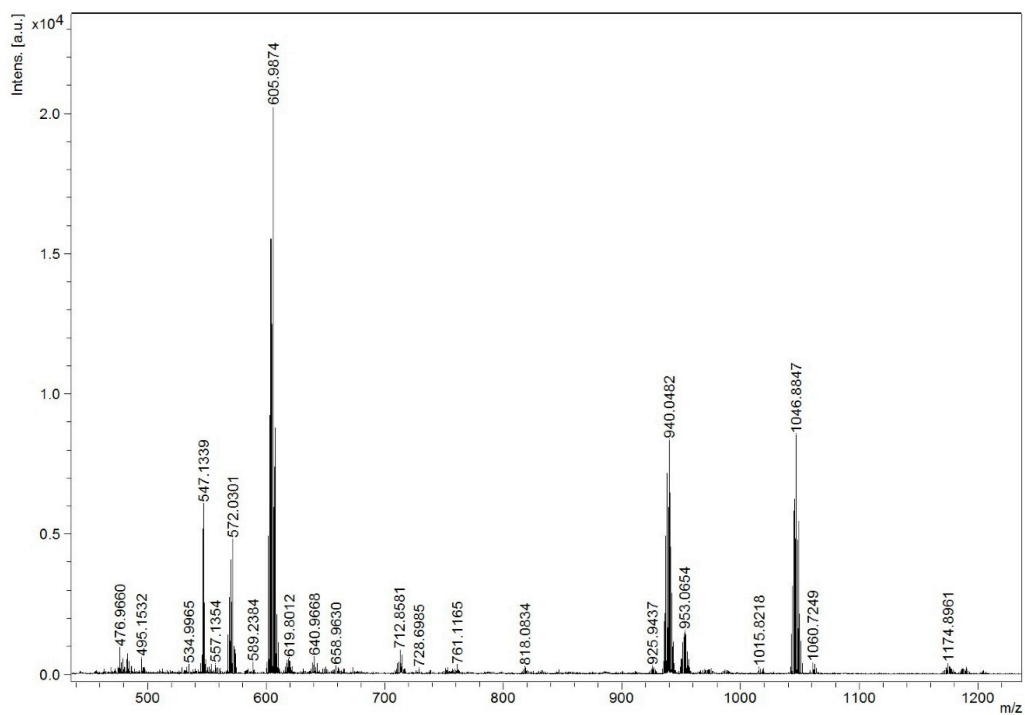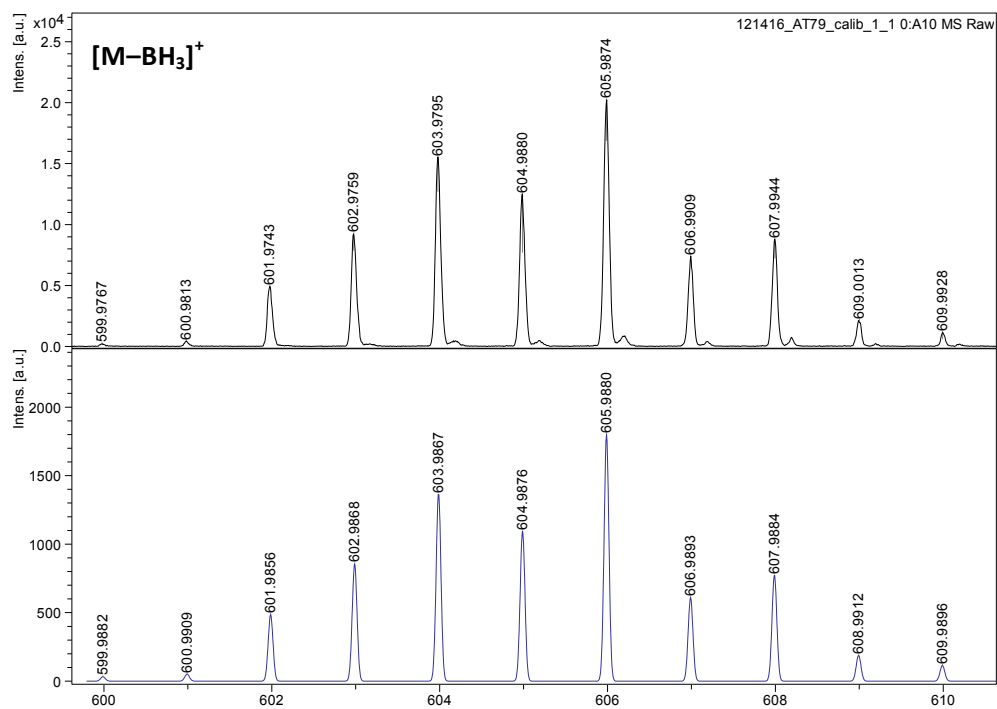

**Figure S37.** MALDI-TOF mass spectrum of *rac-5*, the additional peaks at higher molecular weight correspond to  $[rac-6-BH_3]^+$  (940.0842 Da) and an undetermined dimeric species.

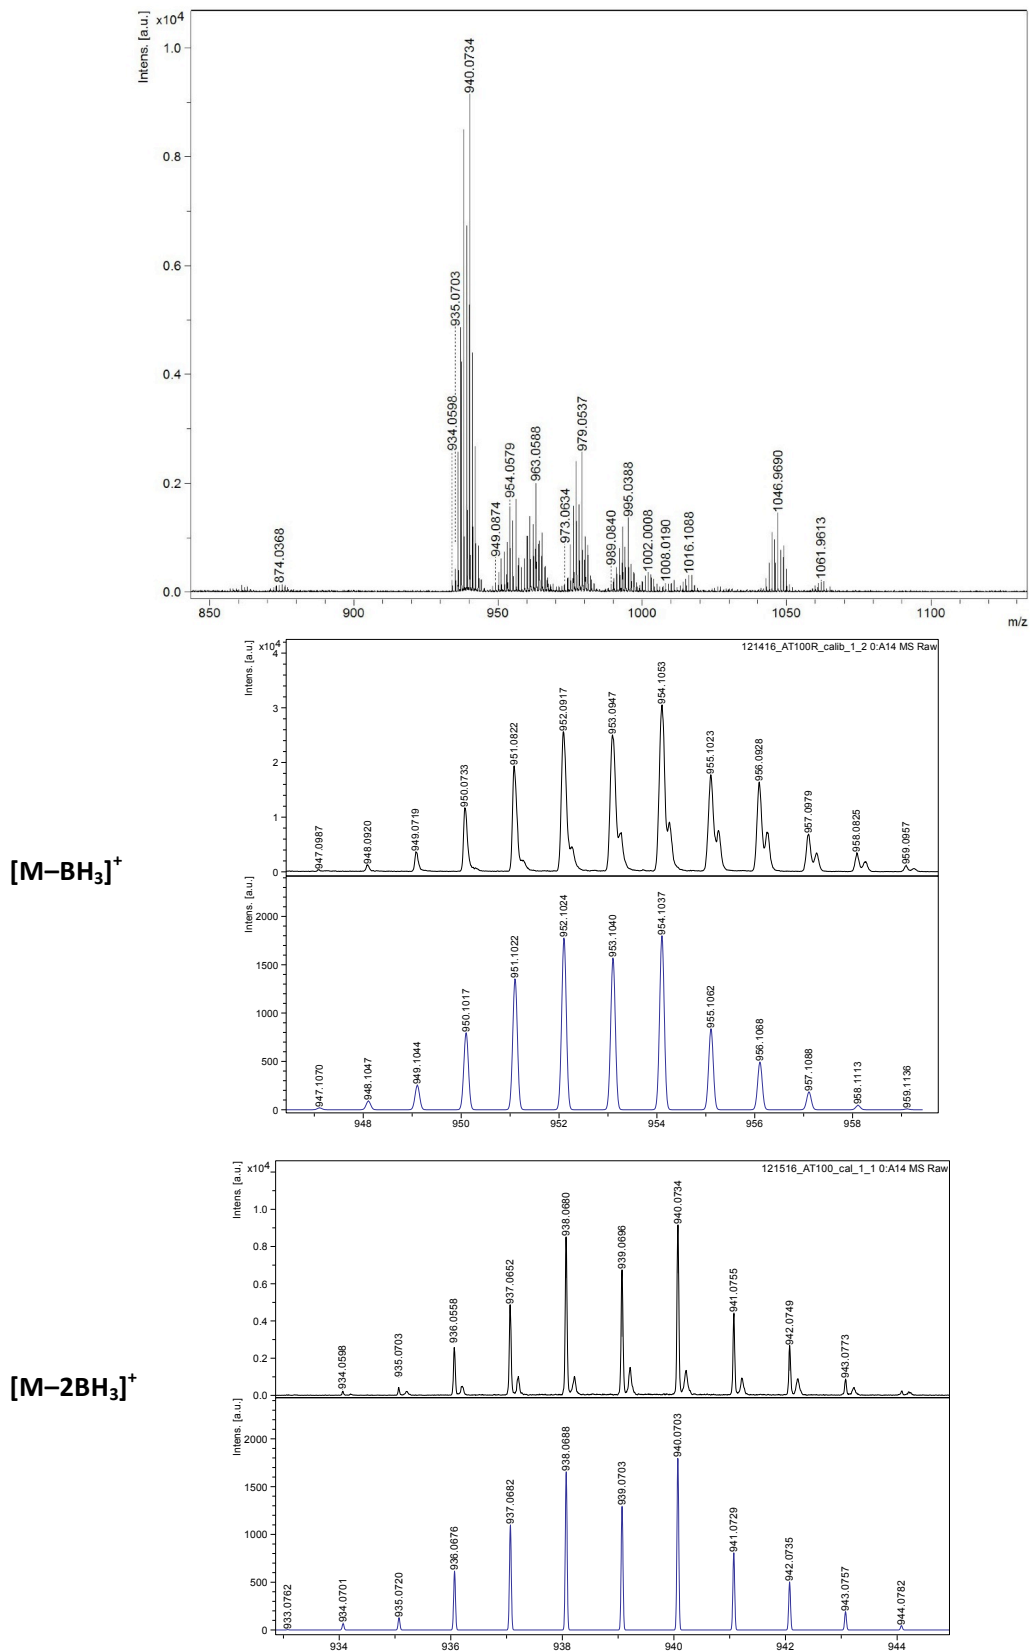

Figure S38. MALDI-TOF mass spectrum of (pSpS)-6.

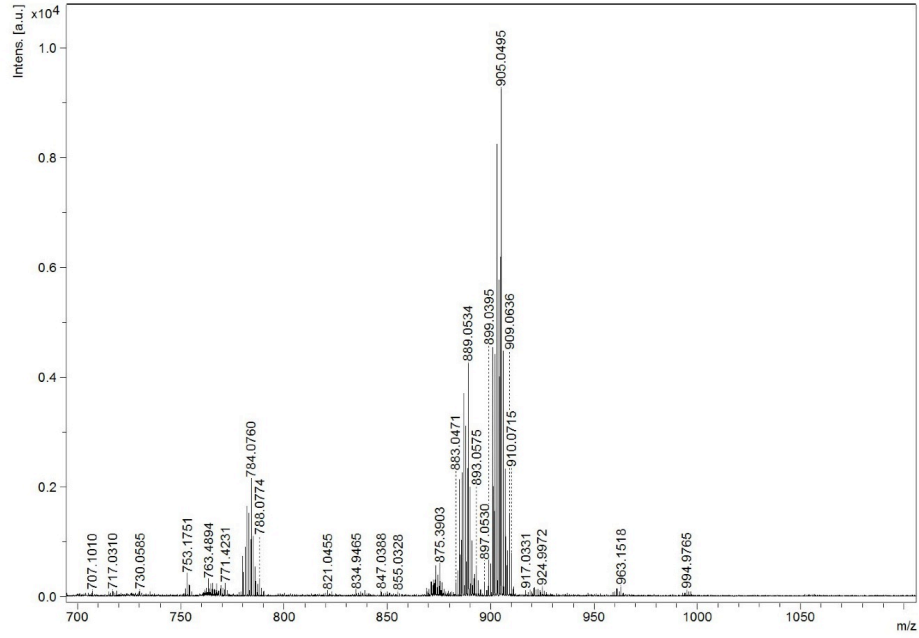

$[M-BH_3 + O]^+$

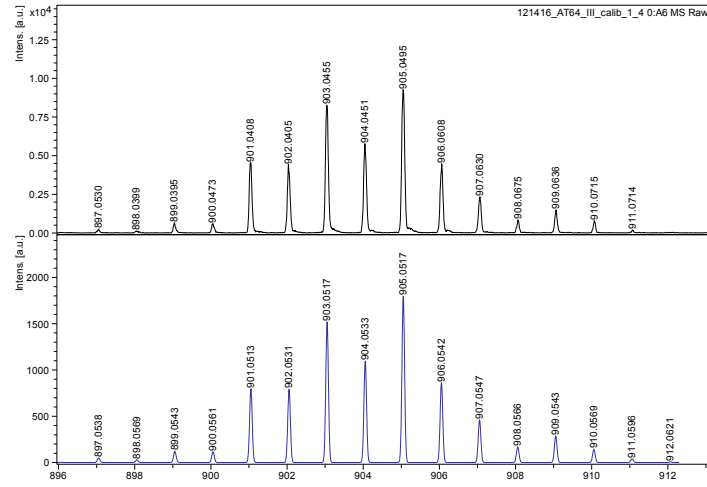

$[M-BH_3 + H]^+$

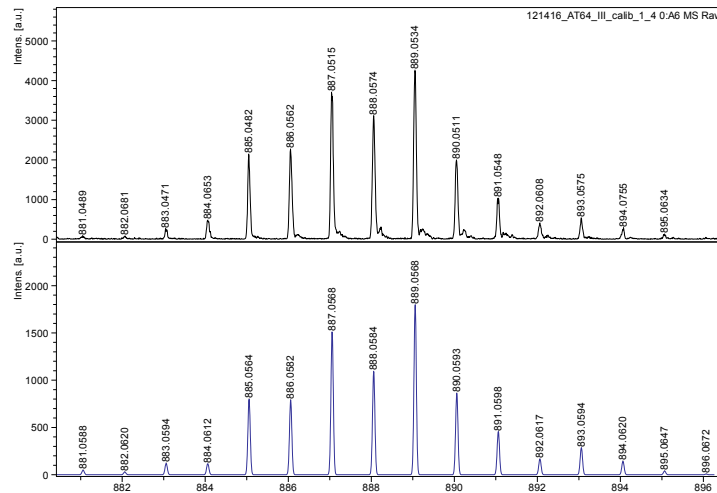

Figure S39. MALDI-TOF mass spectrum of (pSpS)-7.

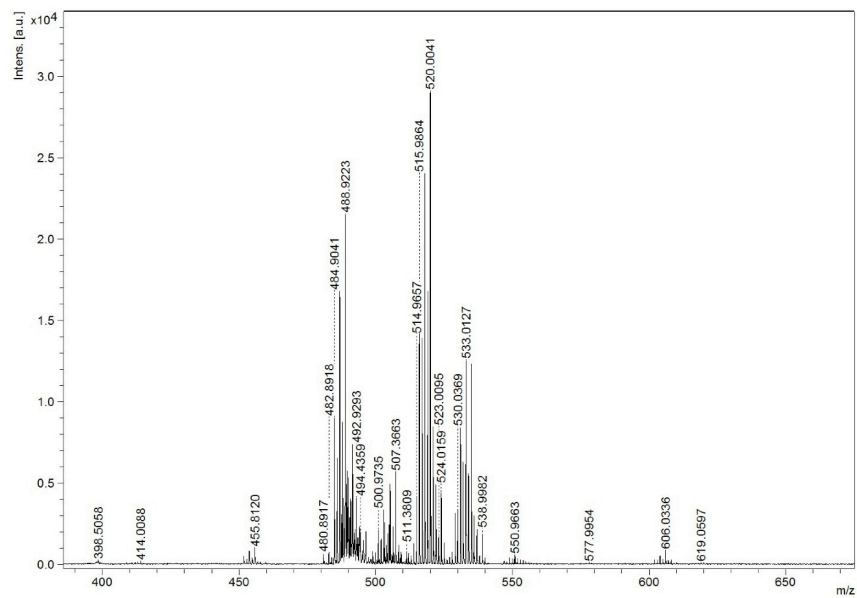

$[M-BH_3-H+O]^+$

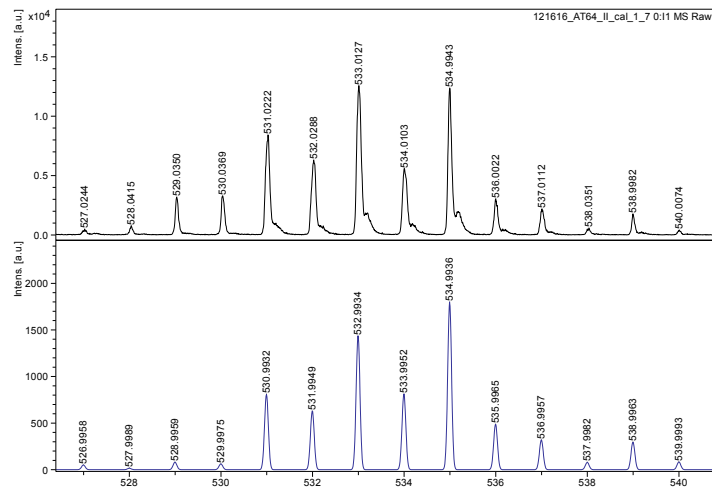

$[M-BH_3]^+$

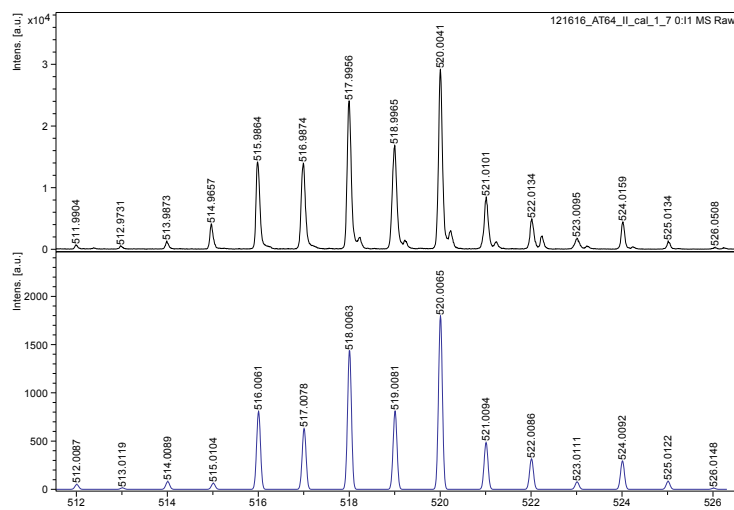

Figure S40. MALDI-TOF mass spectrum of (pS)-8.

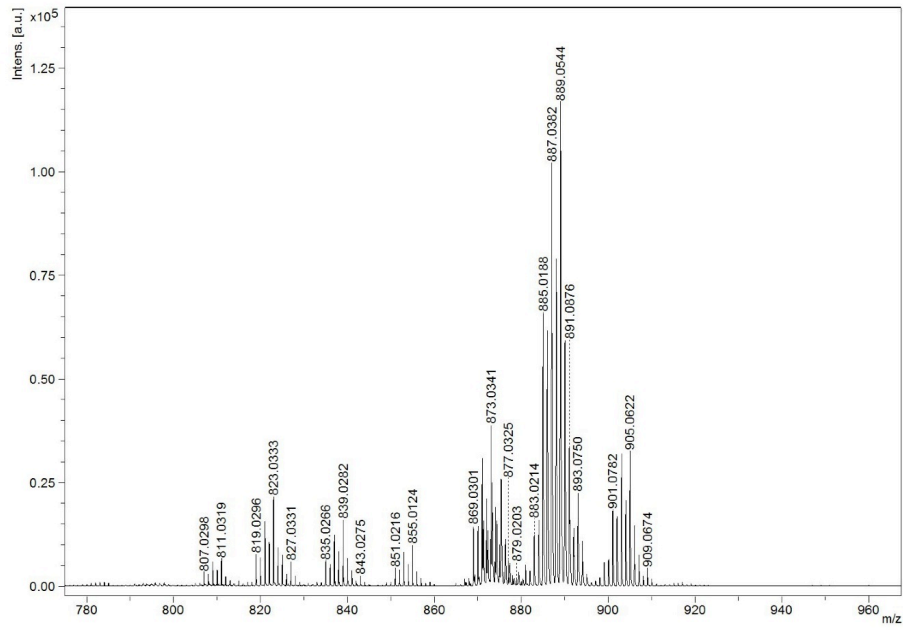

$[M-2BH_3 + O]^+$

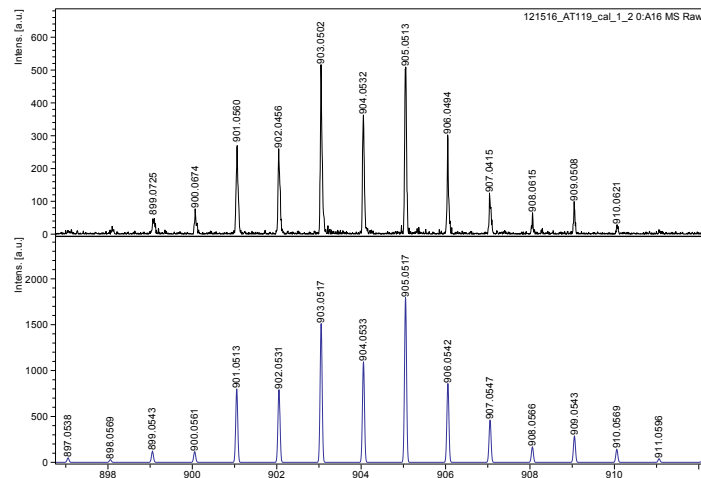

$[M-2BH_3 + H]^+$

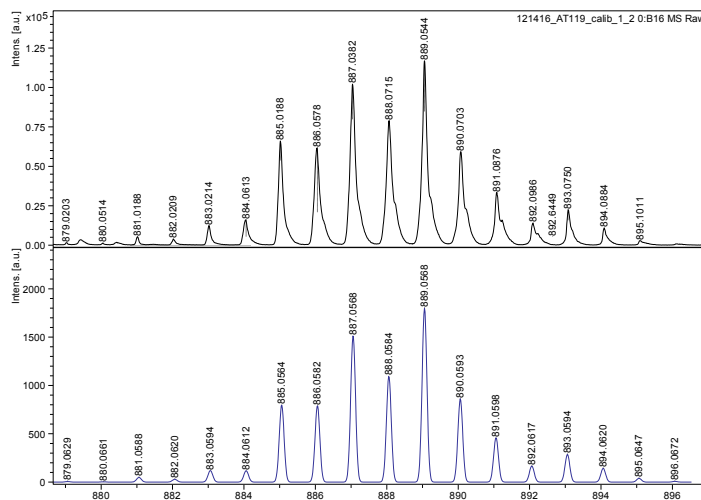

Figure S41. MALDI-TOF mass spectrum of (pRpR)-10.



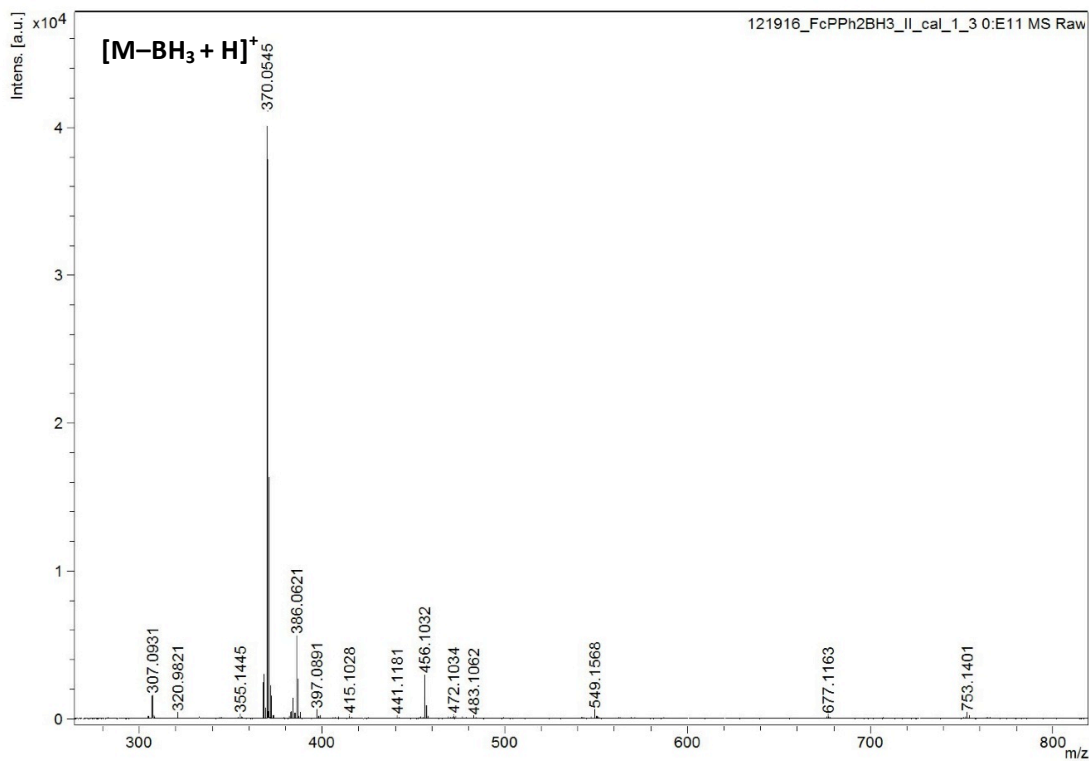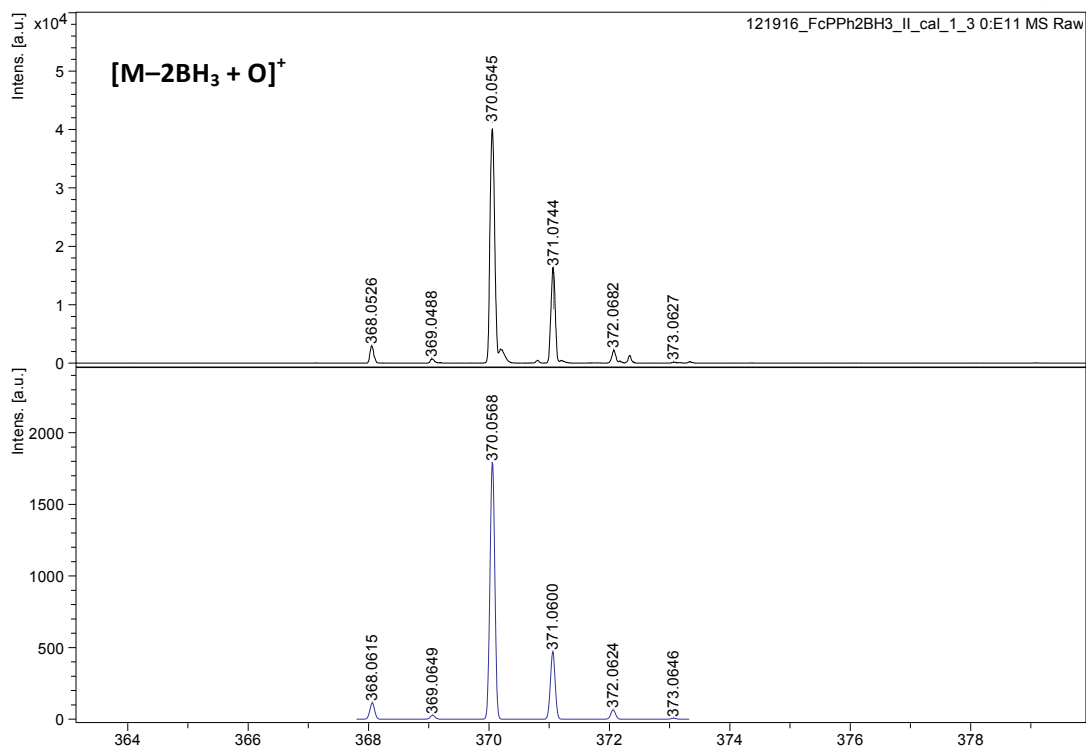

Figure S42. MALDI-TOF mass spectrum of  $FcPPh_2 \cdot BH_3$ .

**Table S1.** Crystal data and structure refinement details for (pS)-3, (pS)-4, *rac*-5, and (pSpS)-7.

|                                                                                                                                                  |                                                                     |                                                                 |                                                                   |                                                                   |
|--------------------------------------------------------------------------------------------------------------------------------------------------|---------------------------------------------------------------------|-----------------------------------------------------------------|-------------------------------------------------------------------|-------------------------------------------------------------------|
| Compound                                                                                                                                         | (pS)-3                                                              | (pS)-4                                                          | <i>rac</i> -5                                                     | (pSpS)-7                                                          |
| empirical formula                                                                                                                                | C <sub>25</sub> H <sub>30</sub> BF <sub>2</sub> FeP <sub>2</sub> Sn | C <sub>24</sub> H <sub>27</sub> BClFeP <sub>2</sub> Sn          | C <sub>22</sub> H <sub>21</sub> BClFeHgP                          | C <sub>46</sub> H <sub>45</sub> BF <sub>2</sub> P <sub>2</sub> Sn |
| MW                                                                                                                                               | 546.81                                                              | 567.22                                                          | 619.06                                                            | 900.96                                                            |
| <i>T</i> , K                                                                                                                                     | 100                                                                 | 100                                                             | 100                                                               | 100                                                               |
| wavelength, Å                                                                                                                                    | 1.54178                                                             | 1.54178                                                         | 1.54178                                                           | 1.54178                                                           |
| crystal system                                                                                                                                   | Orthorhombic                                                        | Orthorhombic                                                    | Orthorhombic                                                      | Orthorhombic                                                      |
| space group                                                                                                                                      | <i>P</i> 2 <sub>1</sub> 2 <sub>1</sub>                              | <i>P</i> 2 <sub>1</sub> 2 <sub>1</sub>                          | <i>P</i> bca                                                      | <i>P</i> 2 <sub>1</sub> 2 <sub>1</sub>                            |
| <i>a</i> , Å                                                                                                                                     | 7.4543(2)                                                           | 7.3385(2)                                                       | 15.7369(8)                                                        | 10.8780(2)                                                        |
| <i>b</i> , Å                                                                                                                                     | 16.4141(4)                                                          | 16.5867(4)                                                      | 15.0095(7)                                                        | 17.5543(4)                                                        |
| <i>c</i> , Å                                                                                                                                     | 19.3128(4)                                                          | 19.1137(5)                                                      | 17.5758(8)                                                        | 20.7334(5)                                                        |
| <i>α</i> , deg                                                                                                                                   | 90                                                                  | 90                                                              | 90                                                                | 90                                                                |
| <i>β</i> , deg                                                                                                                                   | 90                                                                  | 90                                                              | 90                                                                | 90                                                                |
| <i>γ</i> , deg                                                                                                                                   | 90                                                                  | 90                                                              | 90                                                                | 90                                                                |
| <i>V</i> , Å <sup>3</sup>                                                                                                                        | 2363.0(1)                                                           | 2326.5(1)                                                       | 4151.5(3)                                                         | 3959.16(15)                                                       |
| <i>Z</i>                                                                                                                                         | 4                                                                   | 4                                                               | 8                                                                 | 4                                                                 |
| $\rho_{\text{calc}}$ , g cm <sup>-3</sup>                                                                                                        | 1.537                                                               | 1.619                                                           | 1.981                                                             | 1.512                                                             |
| $\mu$ (Cu K $\alpha$ ), mm <sup>-1</sup>                                                                                                         | 14.01                                                               | 15.29                                                           | 20.61                                                             | 11.78                                                             |
| crystal size, mm                                                                                                                                 | 0.38×0.21×0.18                                                      | 0.26×0.21×0.07                                                  | 0.26×0.18×0.11                                                    | 0.29×0.23×0.17                                                    |
| $\theta$ range, deg                                                                                                                              | 3.5–70.5                                                            | 3.5–69.5                                                        | 4.8–68.7                                                          | 3.3–68.8                                                          |
| limiting indices                                                                                                                                 | -8 ≤ <i>h</i> ≤ 8<br>-20 ≤ <i>k</i> ≤ 19<br>-23 ≤ <i>l</i> ≤ 22     | -6 ≤ <i>h</i> ≤ 8<br>-20 ≤ <i>k</i> ≤ 18<br>-21 ≤ <i>l</i> ≤ 23 | -16 ≤ <i>h</i> ≤ 17<br>-17 ≤ <i>k</i> ≤ 18<br>-20 ≤ <i>l</i> ≤ 20 | -12 ≤ <i>h</i> ≤ 12<br>-20 ≤ <i>k</i> ≤ 21<br>-24 ≤ <i>l</i> ≤ 24 |
| reflns collected                                                                                                                                 | 21972                                                               | 15955                                                           | 36723                                                             | 34745                                                             |
| independent reflns                                                                                                                               | 4183                                                                | 3813                                                            | 3696                                                              | 6872                                                              |
|                                                                                                                                                  | [ <i>R</i> (int) = 0.036]                                           | [ <i>R</i> (int) = 0.026]                                       | [ <i>R</i> (int) = 0.040]                                         | [ <i>R</i> (int) = 0.050]                                         |
| absorption correction                                                                                                                            | Numerical                                                           | Numerical                                                       | Numerical                                                         | Numerical                                                         |
| data/restraints/parameters                                                                                                                       | 4183/3/274                                                          | 3813/0/273                                                      | 3696/0/256                                                        | 6872/3/480                                                        |
| goodness-of-fit on <i>F</i> <sup>2</sup>                                                                                                         | 1.05                                                                | 1.03                                                            | 1.13                                                              | 0.98                                                              |
| final <i>R</i> indices, [ <i>I</i> > 2 $\sigma$ ( <i>I</i> )] <sup>[a]</sup>                                                                     | 0.016, w <i>R</i> 2 = 0.040                                         | 0.018, w <i>R</i> 2 = 0.038                                     | 0.022, w <i>R</i> 2 = 0.067                                       | 0.021, w <i>R</i> 2 = 0.044                                       |
| <i>R</i> indices (all data) <sup>[a]</sup>                                                                                                       | 0.017                                                               | 0.019                                                           | 0.0256                                                            | 0.022                                                             |
| peak <sub>max</sub> /hole <sub>min</sub> (e Å <sup>-3</sup> )                                                                                    | 0.38 / -0.35                                                        | 0.50 / -0.41                                                    | 0.83 / -1.15                                                      | 0.27 / -0.31                                                      |
| absolute structure parameter                                                                                                                     | 0.038(3)                                                            | 0.020(3)                                                        | -                                                                 | 0.027(2)                                                          |
| <sup>[a]</sup> <i>R</i> 1 = $\Sigma   F_o  -  F_c   / \Sigma  F_o $ ; w <i>R</i> 2 = $\{\Sigma [w(F_o^2 - F_c^2)^2] / \Sigma [w(F_o^2)]\}^{1/2}$ |                                                                     |                                                                 |                                                                   |                                                                   |

## Computational Details for the Optimized Structures of (pS)-3 and (pS)-4

### Compound (pS)-3

Stoichiometry  $C_{25}H_{30}BF_2PSn$   
 Framework group  $C1[X(C_{25}H_{30}BF_2PSn)]$   
 Deg. of freedom 171  
 Full point group  $C1 \quad NOp \quad 1$   
 Largest Abelian subgroup  $C1 \quad NOp \quad 1$   
 Largest concise Abelian subgroup  $C1 \quad NOp \quad 1$

#### **Selected Distances:**

$H1 \cdots Sn1 = 3.129 \text{ \AA}$ ,  $P1-B1 = 1.939 \text{ \AA}$

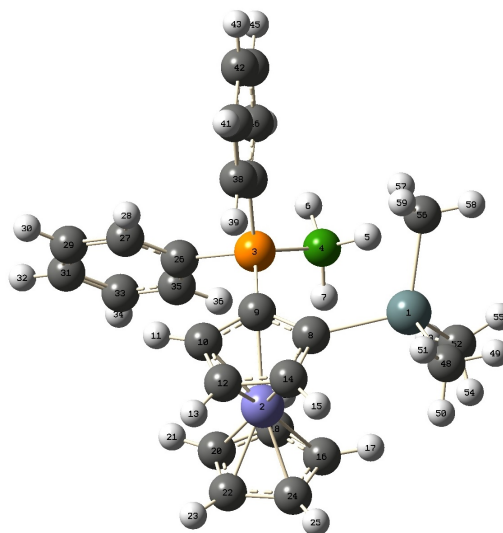

#### **Standard orientation:**

| Center Number | Atomic Number | Coordinates (Angstroms) |           |           |
|---------------|---------------|-------------------------|-----------|-----------|
|               |               | X                       | Y         | Z         |
| 1             | 50            | -2.58529                | 1.199284  | 0.337887  |
| 2             | 26            | -0.790654               | -1.935737 | -0.611357 |
| 3             | 15            | 1.399948                | 0.439541  | 0.551407  |
| 4             | 5             | 0.739987                | 0.709201  | 2.337561  |
| 5             | 1             | -0.091022               | 1.54001   | 2.151053  |
| 6             | 1             | 1.660059                | 1.215123  | 2.897112  |
| 7             | 1             | 0.398522                | -0.358819 | 2.747869  |
| 8             | 6             | -1.170403               | 0.07523   | -0.810315 |
| 9             | 6             | 0.263758                | -0.185455 | -0.683922 |
| 10            | 6             | 0.655404                | -1.062638 | -1.769566 |
| 11            | 1             | 1.57566                 | -1.42283  | -1.932356 |
| 12            | 6             | -0.498517               | -1.331822 | -2.559508 |
| 13            | 1             | -0.535087               | -1.916885 | -3.369736 |
| 14            | 6             | -1.592088               | -0.638033 | -1.97695  |
| 15            | 1             | -2.531896               | -0.673382 | -2.312814 |
| 16            | 6             | -1.957743               | -2.622607 | 0.930012  |
| 17            | 1             | -2.604682               | -2.076636 | 1.462663  |
| 18            | 6             | -0.589706               | -2.819927 | 1.234482  |
| 19            | 1             | -0.103202               | -2.435735 | 2.018957  |
| 20            | 6             | -0.024525               | -3.648508 | 0.22594   |
| 21            | 1             | 0.926355                | -3.956572 | 0.177106  |
| 22            | 6             | -1.050772               | -3.954385 | -0.702215 |
| 23            | 1             | -0.952316               | -4.521314 | -1.520511 |
| 24            | 6             | -2.250903               | -3.322901 | -0.267319 |
| 25            | 1             | -3.140851               | -3.367902 | -0.721499 |
| 26            | 6             | 2.837419                | -0.679918 | 0.453404  |
| 27            | 6             | 3.763507                | -0.580296 | -0.588939 |
| 28            | 1             | 3.664508                | 0.095568  | -1.249582 |
| 29            | 6             | 4.826001                | -1.463959 | -0.657907 |
| 30            | 1             | 5.443169                | -1.407464 | -1.377637 |
| 31            | 6             | 4.993319                | -2.437421 | 0.32516   |

|    |   |           |           |           |
|----|---|-----------|-----------|-----------|
| 32 | 1 | 5.731654  | -3.034477 | 0.284395  |
| 33 | 6 | 4.086155  | -2.527813 | 1.356291  |
| 34 | 1 | 4.202716  | -3.189376 | 2.027935  |
| 35 | 6 | 2.997506  | -1.661788 | 1.423586  |
| 36 | 1 | 2.36777   | -1.740552 | 2.131064  |
| 37 | 6 | 2.024339  | 2.03581   | -0.066649 |
| 38 | 6 | 1.291715  | 2.826815  | -0.936768 |
| 39 | 1 | 0.47601   | 2.496789  | -1.296752 |
| 40 | 6 | 1.732783  | 4.09086   | -1.290692 |
| 41 | 1 | 1.216565  | 4.627576  | -1.880302 |
| 42 | 6 | 2.930994  | 4.576753  | -0.779261 |
| 43 | 1 | 3.238723  | 5.442151  | -1.022571 |
| 44 | 6 | 3.674737  | 3.791711  | 0.08608   |
| 45 | 1 | 4.498531  | 4.119828  | 0.428179  |
| 46 | 6 | 3.231018  | 2.530027  | 0.458346  |
| 47 | 1 | 3.739736  | 2.004961  | 1.06451   |
| 48 | 6 | -4.412613 | 0.876052  | -0.758687 |
| 49 | 1 | -5.167185 | 1.243732  | -0.252387 |
| 50 | 1 | -4.545997 | -0.085714 | -0.892856 |
| 51 | 1 | -4.35292  | 1.322257  | -1.629088 |
| 52 | 6 | -2.91545  | 0.560593  | 2.368493  |
| 53 | 1 | -2.167507 | -0.002804 | 2.658403  |
| 54 | 1 | -3.750285 | 0.046688  | 2.417337  |
| 55 | 1 | -2.978767 | 1.344524  | 2.951408  |
| 56 | 6 | -2.046557 | 3.267888  | 0.334065  |
| 57 | 1 | -1.163399 | 3.375373  | 0.743673  |
| 58 | 1 | -2.707308 | 3.778643  | 0.844827  |
| 59 | 1 | -2.02146  | 3.597443  | -0.589347 |

### Compound (pS)-4

Stoichiometry  $C_{24}H_{27}BClFePSn$   
Framework group  $C1[X(C_{24}H_{27}BClFePSn)]$   
Deg. of freedom 162  
Full point group  $C1 \quad NOp \quad 1$   
Largest Abelian subgroup  $C1 \quad NOp \quad 1$   
Largest concise Abelian subgroup  $C1 \quad NOp \quad 1$

#### Selected Distances:

$H1 \cdots Sn1 = 2.631 \text{ \AA}$ ,  $P1-B1 = 1.944 \text{ \AA}$

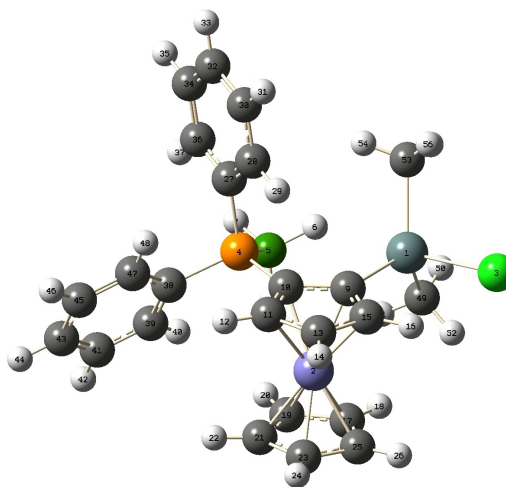

#### Standard orientation:

| Center Number | Atomic Number | Coordinates (Angstroms) |           |           |
|---------------|---------------|-------------------------|-----------|-----------|
|               |               | X                       | Y         | Z         |
| 1             | 50            | -2.387491               | 1.053314  | 0.483656  |
| 2             | 26            | -0.581954               | -1.988349 | -0.608665 |
| 3             | 17            | -4.413978               | 0.647573  | -0.741682 |
| 4             | 15            | 1.506943                | 0.497409  | 0.486467  |
| 5             | 5             | 0.731641                | 0.783261  | 2.225411  |
| 6             | 1             | -0.135303               | 1.493664  | 1.988938  |
| 7             | 1             | 1.559874                | 1.289407  | 2.768124  |
| 8             | 1             | 0.454398                | -0.182868 | 2.686438  |
| 9             | 6             | -1.051563               | -0.007618 | -0.796202 |
| 10            | 6             | 0.380792                | -0.192745 | -0.724452 |
| 11            | 6             | 0.768098                | -1.053679 | -1.82369  |
| 12            | 1             | 1.695888                | -1.370848 | -2.021881 |
| 13            | 6             | -0.392187               | -1.37801  | -2.560602 |
| 14            | 1             | -0.429195               | -1.969557 | -3.365233 |
| 15            | 6             | -1.503912               | -0.740575 | -1.944024 |
| 16            | 1             | -2.454978               | -0.815386 | -2.246204 |
| 17            | 6             | -1.745885               | -2.757035 | 0.892977  |
| 18            | 1             | -2.458775               | -2.260495 | 1.38665   |
| 19            | 6             | -0.389626               | -2.826751 | 1.265923  |
| 20            | 1             | 0.025492                | -2.395025 | 2.064962  |
| 21            | 6             | 0.28166                 | -3.607091 | 0.297166  |
| 22            | 1             | 1.257278                | -3.826917 | 0.296554  |
| 23            | 6             | -0.666676               | -4.02463  | -0.677975 |
| 24            | 1             | -0.479761               | -4.597013 | -1.476591 |
| 25            | 6             | -1.93308                | -3.48983  | -0.299277 |
| 26            | 1             | -2.797622               | -3.615034 | -0.78561  |
| 27            | 6             | 2.066287                | 2.1125    | -0.133623 |
| 28            | 6             | 1.232687                | 2.92263   | -0.892193 |

|    |   |           |           |           |
|----|---|-----------|-----------|-----------|
| 29 | 1 | 0.400481  | 2.584349  | -1.2042   |
| 30 | 6 | 1.606482  | 4.225473  | -1.202454 |
| 31 | 1 | 1.030393  | 4.77083   | -1.725891 |
| 32 | 6 | 2.807298  | 4.730431  | -0.750716 |
| 33 | 1 | 3.054246  | 5.625762  | -0.951504 |
| 34 | 6 | 3.658284  | 3.921068  | 0.000565  |
| 35 | 1 | 4.496516  | 4.256278  | 0.293698  |
| 36 | 6 | 3.278619  | 2.629793  | 0.31862   |
| 37 | 1 | 3.850403  | 2.091511  | 0.852564  |
| 38 | 6 | 2.971578  | -0.569082 | 0.426114  |
| 39 | 6 | 3.191457  | -1.48142  | 1.436744  |
| 40 | 1 | 2.579852  | -1.541903 | 2.161109  |
| 41 | 6 | 4.305864  | -2.314384 | 1.399448  |
| 42 | 1 | 4.456598  | -2.932401 | 2.1063    |
| 43 | 6 | 5.191114  | -2.253965 | 0.346876  |
| 44 | 1 | 5.94783   | -2.826981 | 0.322829  |
| 45 | 6 | 4.968048  | -1.346089 | -0.678138 |
| 46 | 1 | 5.564936  | -1.310459 | -1.41635  |
| 47 | 6 | 3.880512  | -0.494362 | -0.632667 |
| 48 | 1 | 3.748843  | 0.143066  | -1.323557 |
| 49 | 6 | -2.868549 | 0.319819  | 2.440408  |
| 50 | 1 | -2.84552  | 1.060101  | 3.081112  |
| 51 | 1 | -2.213835 | -0.36047  | 2.703667  |
| 52 | 1 | -3.76467  | -0.077096 | 2.428536  |
| 53 | 6 | -2.175888 | 3.165855  | 0.33518   |
| 54 | 1 | -1.269819 | 3.423756  | 0.605279  |
| 55 | 1 | -2.828189 | 3.601773  | 0.924183  |
| 56 | 1 | -2.333224 | 3.445351  | -0.590963 |

## Second Order Perturbation Theory Analysis of Fock Matrix in NBO Basis

### Compound (pS)-3:

| Donor NBO (i)     | Acceptor NBO (j) | E(2)     | E(j)-E(i) | F(i,j) |
|-------------------|------------------|----------|-----------|--------|
|                   |                  | kcal/mol | a.u.      | a.u.   |
| 8. BD (1) B4 - H5 | / 133. LP*(1)Sn1 | 0.20     | 0.40      | 0.009  |

### Compound (pS)-4:

| Donor NBO (i)     | Acceptor NBO (j) | E(2)     | E(j)-E(i) | F(i,j) |
|-------------------|------------------|----------|-----------|--------|
|                   |                  | kcal/mol | a.u.      | a.u.   |
| 7. BD (1) B5 - H6 | / 134. LP*(2)Sn1 | 5.46     | 0.37      | 0.043  |

## Atoms in Molecules (AIM) Analysis of Compound (pS)-4:

Electron Density and Laplacian of the Electron Density at the BCPs:

| BCP # | Name | Atoms | Rho     | DelSqRho | Ellipticity | K        | BPL - GBL_I        |
|-------|------|-------|---------|----------|-------------|----------|--------------------|
| 1     | 1    | BCP1  | Sn1-C9  | 0.058257 | +0.441543   | 0.098363 | +0.003085 0.000321 |
| 2     | 2    | BCP2  | Sn1-C13 | 0.031057 | +0.263762   | 0.180649 | +0.000203 0.001279 |
| 3     | 3    | BCP3  | Sn1-H6  | 0.008196 | +0.040694   | 3.173225 | -0.001239 0.027879 |
| 4     | 4    | BCP4  | P4-B5   | 0.117967 | -0.123341   | 0.015182 | +0.091664 0.000114 |
| 5     | 5    | BCP5  | B5-H6   | 0.163606 | -0.186163   | 0.031616 | +0.152568 0.000261 |
| 6     | 6    | BCP6  | B5-H7   | 0.167393 | -0.261977   | 0.015456 | +0.157056 0.000111 |
| 7     | 7    | BCP7  | B5-H8   | 0.165492 | -0.233826   | 0.024250 | +0.155217 0.000133 |
| 8     | 8    | BCP8  | C13-H16 | 0.006648 | +0.026096   | 0.304853 | -0.001318 0.109756 |
| 9     | 9    | BCP9  | Fe2-C10 | 0.053785 | +0.263912   | 1.829033 | +0.015711 0.379691 |
| 10    | 10   | BCP10 | P4-C10  | 0.167724 | -0.281002   | 0.033883 | +0.165734 0.001202 |
| 11    | 11   | BCP11 | C9-C10  | 0.282342 | -0.794933   | 0.036028 | +0.273013 0.020816 |
| 12    | 12   | BCP12 | C10-C11 | 0.291520 | -0.729070   | 0.485689 | +0.290491 0.009605 |
| 13    | 13   | BCP13 | C11-H12 | 0.279412 | -0.986564   | 0.019557 | +0.279439 0.001116 |
| 14    | 14   | BCP14 | C11-C13 | 0.295221 | -0.823018   | 0.149306 | +0.305908 0.089367 |
| 15    | 15   | BCP15 | Fe2-C13 | 0.049639 | +0.369907   | 0.128523 | +0.010907 0.170992 |
| 16    | 16   | BCP16 | C13-C15 | 0.294591 | -0.824166   | 0.162673 | +0.304573 0.087089 |
| 17    | 17   | BCP17 | C13-H14 | 0.277657 | -0.885774   | 0.142848 | +0.275465 0.010568 |
| 18    | 18   | BCP18 | Fe2-C9  | 0.053177 | +0.250908   | 1.486597 | +0.017293 0.272246 |
| 19    | 19   | BCP19 | C9-C15  | 0.296944 | -0.735719   | 0.420427 | +0.301185 0.023736 |
| 20    | 20   | BCP20 | C15-H16 | 0.280408 | -0.981077   | 0.025007 | +0.278860 0.000970 |
| 21    | 21   | BCP21 | Fe2-C19 | 0.049804 | +0.265852   | 1.730782 | +0.013919 0.951930 |
| 22    | 22   | BCP22 | Fe2-C21 | 0.049772 | +0.274336   | 1.635907 | +0.013260 1.013026 |
| 23    | 23   | BCP23 | C17-H18 | 0.279963 | -0.983094   | 0.024664 | +0.280751 0.001585 |
| 24    | 24   | BCP24 | H20-H40 | 0.003597 | +0.012389   | 0.850014 | -0.000924 0.383545 |
| 25    | 25   | BCP25 | H8-H20  | 0.005453 | +0.018013   | 0.104974 | -0.001096 0.077273 |
| 26    | 26   | BCP26 | Fe2-C25 | 0.051402 | +0.381232   | 0.074650 | +0.011728 0.146277 |
| 27    | 27   | BCP27 | C17-C19 | 0.301656 | -0.801494   | 0.508203 | +0.308525 0.011939 |
| 28    | 28   | BCP28 | C19-H20 | 0.280003 | -0.985321   | 0.024571 | +0.280537 0.001692 |
| 29    | 29   | BCP29 | C21-C23 | 0.300241 | -0.794696   | 0.507503 | +0.305909 0.012389 |
| 30    | 30   | BCP30 | C19-C21 | 0.293798 | -0.952076   | 0.057943 | +0.298352 0.002183 |
| 31    | 31   | BCP31 | C21-H22 | 0.278303 | -0.975457   | 0.025058 | +0.277941 0.001693 |
| 32    | 32   | BCP32 | C23-C25 | 0.293044 | -0.799945   | 0.165894 | +0.300031 0.089186 |
| 33    | 33   | BCP33 | C17-C25 | 0.293775 | -0.806941   | 0.164471 | +0.301336 0.088000 |
| 34    | 34   | BCP34 | C23-H24 | 0.277909 | -0.972062   | 0.023815 | +0.277608 0.001547 |
| 35    | 35   | BCP35 | C25-H26 | 0.277897 | -0.888962   | 0.141866 | +0.275800 0.009718 |
| 36    | 36   | BCP36 | P4-C27  | 0.163534 | -0.301138   | 0.040719 | +0.159916 0.000486 |
| 37    | 37   | BCP37 | C27-H54 | 0.002591 | +0.006043   | 0.356704 | -0.000427 0.248583 |
| 38    | 38   | BCP38 | C27-C28 | 0.299227 | -0.812036   | 0.488411 | +0.315439 0.000105 |
| 39    | 39   | BCP39 | C28-H29 | 0.280761 | -0.988600   | 0.022208 | +0.281177 0.000073 |
| 40    | 40   | BCP40 | C28-C30 | 0.304601 | -1.061286   | 0.036974 | +0.324759 0.000139 |
| 41    | 41   | BCP41 | C30-C32 | 0.304935 | -0.871338   | 0.514585 | +0.326585 0.000119 |

### Experimental IR Spectral Data and Calculated Frequencies

ATR-FTIR analysis of compound (pS)-**3** revealed two strong and broad absorption bands at 2403 and 2378  $\text{cm}^{-1}$  corresponding to the B–H stretching frequencies. These bands are significantly shifted to 2417 and 2314  $\text{cm}^{-1}$  in the IR spectrum of (pS)-**4**. DFT frequency calculations of the optimized structures predict absorption bands for **3** at 2462, 2524, and 2538  $\text{cm}^{-1}$ ; and for (pS)-**4** at 2443, 2505 and 2546  $\text{cm}^{-1}$ . According to the computed results, the B–H stretching frequencies involved in an agostic-type interaction with the tin atom are assigned to be those at 2538 ((pS)-**3**) and 2443 ((pS)-**4**)  $\text{cm}^{-1}$ , which suggests a bathochromic shift of 95  $\text{cm}^{-1}$  that is similar to the bathochromic shift (89  $\text{cm}^{-1}$ ) when comparing the experimentally observed bands at 2403  $\text{cm}^{-1}$  in (pS)-**3** and 2314  $\text{cm}^{-1}$  in (pS)-**4**. The ATR-FTIR spectra of the parent compound **FcPPh<sub>2</sub>BH<sub>3</sub>** showed a broad absorption band at 2380  $\text{cm}^{-1}$ .

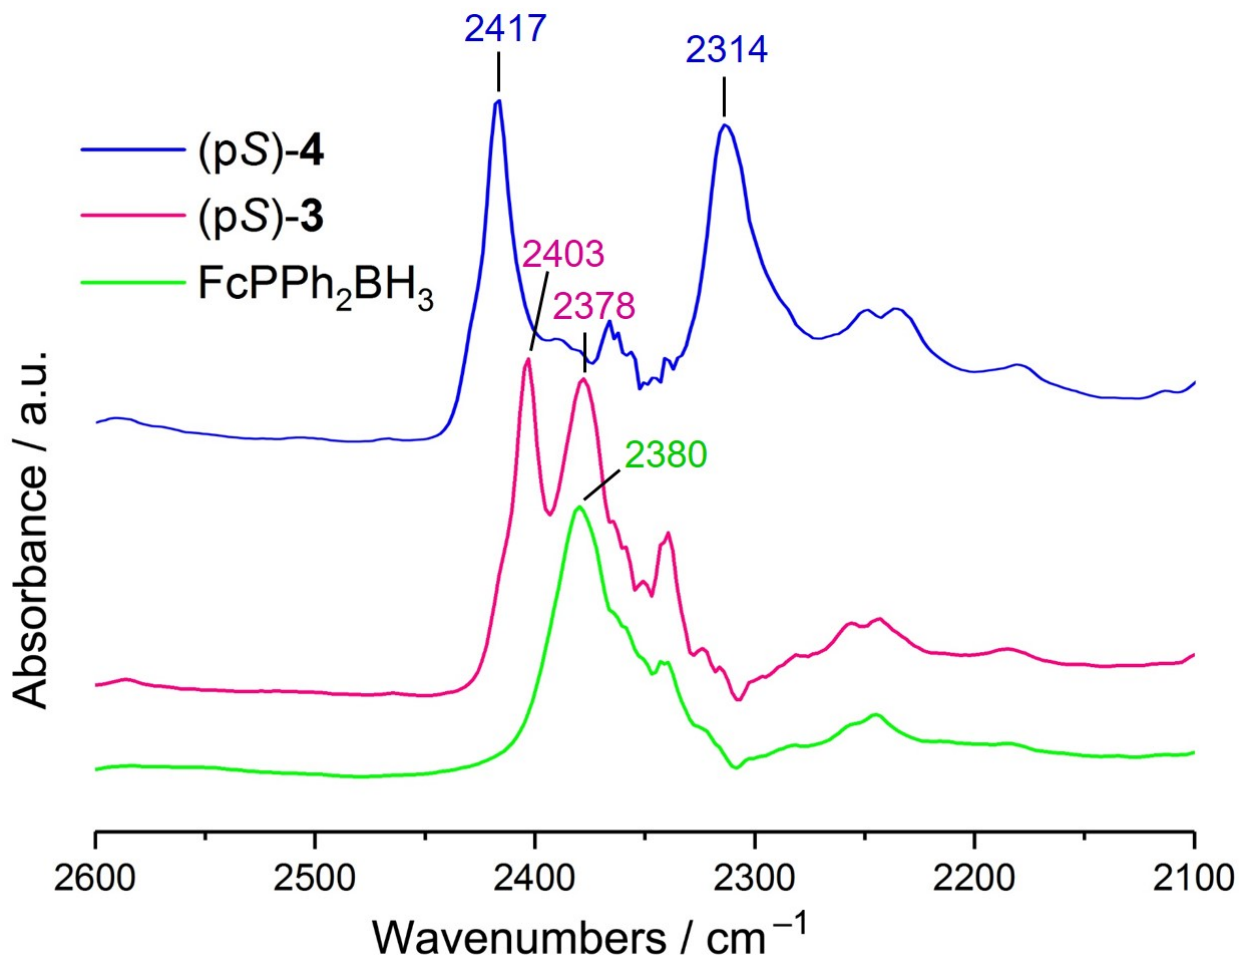



**Calculated Frequencies for Compound (pS)-3:**

Frequencies -- 2461.5186            2523.5996            2538.2687  
Red. masses --    1.0279                1.1106                1.1117  
Frc consts --     3.6695                4.1673                4.2202  
IR Inten --       44.7466                160.6705              139.2541

| Atom | AN | X     | Y     | Z     | X     | Y     | Z     | X     | Y     | Z     |
|------|----|-------|-------|-------|-------|-------|-------|-------|-------|-------|
| 4    | 5  | 0     | -0.01 | -0.04 | -0.09 | -0.05 | -0.02 | -0.05 | 0.09  | -0.02 |
| 5    | 1  | -0.36 | 0.31  | -0.03 | 0.25  | -0.23 | 0.01  | 0.62  | -0.52 | 0.03  |
| 6    | 1  | 0.54  | 0.25  | 0.35  | 0.54  | 0.25  | 0.38  | 0.08  | 0.05  | 0.05  |
| 7    | 1  | -0.15 | -0.5  | 0.15  | 0.16  | 0.56  | -0.19 | -0.17 | -0.52 | 0.17  |

**Calculated Frequencies for Compound (pS)-4:**

Frequencies -- 2442.6894            2505.4818            2545.7510  
Red. masses --    1.0442                1.0872                1.1146  
Frc consts --     3.6709                4.0209                4.2561  
IR Inten --       197.7806                163.3441              118.9582

| Atom | AN | X     | Y     | Z     | X     | Y     | Z     | X     | Y     | Z     |
|------|----|-------|-------|-------|-------|-------|-------|-------|-------|-------|
| 5    | 5  | -0.05 | 0.03  | 0.01  | 0.06  | -0.04 | 0.06  | -0.05 | -0.09 | -0.01 |
| 6    | 1  | 0.73  | -0.5  | 0.14  | -0.34 | 0.23  | -0.05 | -0.03 | 0     | 0     |
| 7    | 1  | -0.22 | -0.15 | -0.17 | -0.44 | -0.35 | -0.38 | 0.44  | 0.32  | 0.38  |
| 8    | 1  | 0.06  | 0.29  | -0.1  | 0.15  | 0.55  | -0.2  | 0.16  | 0.68  | -0.26 |

**References:**

1. M. A. Bennet, M. Contel, D. C. R. Hockless, L. L. Welling, A. C. Willis, *Inorg. Chem.* **2002**, *41*, 844-855.
2. The following van der Waals radii are used: H 1.10, B 1.92, O 1.52, P 1.80, Cl 1.75, Sn 2.17, Hg 2.05 Å; see M. Mantina, A. C. Chamberlin, R. Valero, C. J. Cramer, D. G. Truhlar *J. Phys. Chem. A*, **2009**, *113*, 5806-5812; the value of 2.05 Å for Hg is taken from S. S. Batsanov, *J. Mol. Struct.* 1999, *468*, 151-159.
